# Supplementary material for: The effect of thionation of the carbonyl group on the photophysics of compact spiro rhodamine-naphthalimide electron donor–acceptor dyads: intersystem crossing, charge separation, and electron spin dynamics
Source: Royal Society of Chemistry journal article supplement (doi:10.1039/d3cp04891h), 2023-01-01
Supplement: d3cp04891h1.pdf [file d3cp04891h1.pdf]

## Electronic Supplementary Information for:

# Effect of Thionation of Carbonyl Group on the Photophysics of Compact Spiro Rhodamine-Naphthalimide Electron Donor-Acceptor Dyads: Intersystem Crossing, Charge Separation and Electron Spin Dynamics

Xiao Xiao,<sup>a‡</sup> Tong Mu,<sup>b‡</sup> Andrey A. Sukhanov,<sup>b‡</sup> Yihang Zhou,<sup>a</sup> Peiran Yu,<sup>a</sup> Fabiao Yu,<sup>c</sup> Ayhan Elmali,<sup>d</sup>  
Jianzhang Zhao,<sup>\*a</sup> Ahmet Karatay<sup>\*d</sup> and Violeta K. Voronkova<sup>\*b</sup>

<sup>a</sup>State Key Laboratory of Fine Chemicals, Frontier Science Center for Smart Materials, School of Chemical Engineering, Dalian University of Technology, 2 Ling Gong Rd., Dalian 116024, P. R. China.

\*E-mail: zhaojzh@dlut.edu.cn (J. Z.)

<sup>b</sup>Zavoisky Physical-Technical Institute FRC Kazan Scientific Center of RAS, Sibirsky Tract 10/7, Kazan 420029, Russia. \*E-mail: vio@kfti.knc.ru (V. K. V.)

<sup>c</sup>Key Laboratory of Hainan Trauma and Disaster Rescue, The First Affiliated Hospital of Hainan Medical University, Hainan Medical University, Haikou 571199, P. R. China.

<sup>d</sup>Department of Engineering Physics, Faculty of Engineering, Ankara University, 06100, Ankara, Türkiye. \*E-mail: akaratay@eng.ankara.edu.tr (A. K.)

‡These authors contributed equally to this work.

## Index

|                                                               |          |
|---------------------------------------------------------------|----------|
| 1. General Information and Synthesis.....                     | Page S3  |
| 2. Molecular Structure Characterization Data.....             | Page S5  |
| 3. Crystallographic Data.....                                 | Page S12 |
| 4. UV–vis Absorption and Fluorescence Emission Spectra.....   | Page S13 |
| 5. Electrochemical Studies.....                               | Page S17 |
| 6. Femtosecond Transient Absorption Spectra.....              | Page S18 |
| 7. Nanosecond Transient Absorption Spectra.....               | Page S21 |
| 8. Charge Transfer Quantum Yield.....                         | Page S35 |
| 9. Time-Resolved Electron Paramagnetic Resonance Spectra..... | Page S37 |
| 10. DFT Calculations.....                                     | Page S38 |
| 11. References.....                                           | Page S41 |

## 1. General Information and Synthesis

All the chemicals used in synthesis are analytically pure and were used as received, the solvents were dried and distilled before synthesis.  $^1\text{H}$  and  $^{13}\text{C}$  NMR spectra were recorded on the Bruker Avance spectrometers (400 MHz, 500 MHz or 600 MHz). The mass spectra were measured by EI-TOF-HRMS spectrometer.

**Synthesis of compound 2.**<sup>1</sup> Under  $\text{N}_2$  atmosphere, compound 1 (1.00 g, 5.0 mmol) and sodium dichromate (3.73 g, 14.1 mmol) were dissolved in acetic acid (17 mL). The mixture was stirred and refluxed for 6 h. After the reaction was finished, the mixture was cooled down to room temperature, and the solvent was evaporated under reduced pressure. Then cold water (30 mL) was added to the mixture and the mixture was stirred at 0 °C for 15 min. The solid precipitate was formed and then filtrated. The precipitate was washed with water until the filtrate was neutral. The solid was dried in vacuum to obtain the yellow powder (0.86 g, yield: 71%). The product was directly used for the next step without further purification.

**Synthesis of compound 3.**<sup>1</sup> Under  $\text{N}_2$  atmosphere, *n*-butylamine (0.5 mL, 5.1 mmol) was added to the stirred solution of compound 2 (800 mg, 3.3 mmol) in ethanol (50 mL). The reaction mixture was refluxed at 80 °C for 2 h. After the reaction was finished, the mixture was cooled down to room temperature, and the solvent was evaporated under reduced pressure. Then the residue was purified with column chromatography (silica gel, DCM:PE = 3:1, v/v) to give a light yellow solid (521 mg, yield: 53%).  $^1\text{H}$  NMR ( $\text{CDCl}_3$ , 400 MHz):  $\delta$  8.84–8.82 (m, 1H), 8.74–8.72 (m, 1H), 8.70–8.67 (m, 1H), 8.41–8.39 (m, 1H), 8.01–7.96 (m, 1H), 4.19 (t,  $J = 7.6$  Hz, 2H), 1.77–1.69 (m, 2H), 1.50–1.41 (m, 2H), 0.99 (t,  $J = 7.4$  Hz, 3 H).

**Synthesis of compound 4.**<sup>1</sup> Under  $\text{N}_2$  atmosphere, Compound 3 (420 mg, 1.4 mmol) and  $\text{SnCl}_2 \cdot 2\text{H}_2\text{O}$  (2.06 g, 9.1 mmol) were dissolved in ethanol (15 mL), and then hydrochloric acid (6 mL) was added into the mixture dropwise. The reaction mixture was stirred at room temperature for 0.5 h. Then, the reaction was quenched by the 10%  $\text{Na}_2\text{CO}_3$  aqueous solution (60 mL) and filtered. The filtrate was washed with water ( $3 \times 45$  mL) to obtain the viscous orange solid. Then the solid was dissolved in the DCM (60 mL) and washed with brine solution (60 mL  $\times$  3). The organic layer was dried over the anhydrous  $\text{Na}_2\text{SO}_4$  and the solvent was removed under reduced pressure. Then the solid was dried in vacuum to obtain

the yellow powder (360 mg, yield: 96%). The product was directly used for the next step without further purification.

**Synthesis of compound NIS-NH<sub>2</sub>.**<sup>2</sup> Compound 4 (0.28 g, 1.0 mmol) and Lawesson's reagent (1.68 g, 4.2 mmol) were dissolved in dry toluene (25 mL). The mixture was stirred and refluxed for 21 h. After the reaction was finished, the mixture was cooled down to room temperature, and the solvent was evaporated under reduced pressure. The residue was purified with column chromatography (silica gel, DCM:PE = 3:2, v/v) to give a black powder (89 mg, yield: 30%). M.p.: 177.0–177.8 °C. <sup>1</sup>H NMR (CDCl<sub>3</sub>, 400 MHz): δ 9.00 (d, *J* = 7.8 Hz, 1H), 8.85 (d, *J* = 8.4 Hz, 1H), 8.01 (d, *J* = 8.0 Hz, 1H), 7.55–7.52 (m, 1H), 6.81 (d, *J* = 8.4 Hz, 1H), 5.40 (s, 2H), 5.10 (s, 2H), 1.96–1.88 (m, 2H), 1.50–1.45 (m, 2H), 1.00 (t, *J* = 7.4 Hz, 3H). HRMS-ESI ([C<sub>16</sub>H<sub>16</sub>N<sub>2</sub>S<sub>2</sub> + H]<sup>+</sup>), *m/z*: calcd: 301.0833; found: 301.0813.

**Synthesis of compound NIS-NHAc.** NIS-NH<sub>2</sub> (66.7 mg, 0.25 mmol) were dissolved in acetic acid (0.5 mL) and acetic anhydride (0.5 mL). The mixture was stirred and refluxed for 12 h. After the reaction was finished, the mixture was cooled down to room temperature, and the solvent was evaporated under reduced pressure. The residue was purified with column chromatography (silica gel, DCM) to give a dark red powder (22.0 mg, yield: 26%). M.p.: 235.4–236.8 °C. <sup>1</sup>H NMR (DMSO-*d*<sub>6</sub>, 400 MHz): δ 10.40 (s, 1H), 8.89 (d, *J* = 7.8 Hz, 1H), 8.82 (d, *J* = 8.6 Hz, 1H), 8.75 (d, *J* = 8.5 Hz, 1H), 8.33 (d, *J* = 8.5 Hz, 1H), 7.82 (dd, *J* = 7.8 Hz, 1H), 5.26 (t, *J* = 7.4 Hz, 2H), 2.30 (s, 3H), 1.88–1.81 (m, 2H), 1.46–1.37 (m, 2H), 0.96 (t, *J* = 7.4 Hz, 3H). <sup>13</sup>C NMR (DMSO-*d*<sub>6</sub>, 100 MHz): δ 190.11, 189.11, 169.64, 141.09, 139.22, 138.15, 129.23, 128.59, 126.92, 124.34, 123.44, 122.94, 119.84, 54.12, 26.82, 24.20, 19.44, 13.50. HRMS-ESI ([C<sub>18</sub>H<sub>18</sub>N<sub>2</sub>OS<sub>2</sub> + H]<sup>+</sup>), *m/z*: calcd: 343.0939; found: 343.0946.

**Synthesis of compound Rho.**<sup>3</sup> Under N<sub>2</sub> atmosphere, RB (100 mg, 0.23 mmol) were dissolved in dry 1,2-dichloroethane (5 mL), then POCl<sub>3</sub> (0.1 mL) was added dropwise to the mixture. The reaction mixture was stirred and refluxed for 6 h. After cooling down to room temperature, the solvent was evaporated under reduced pressure. The residue was dissolved in dry acetonitrile (10 mL). Then under N<sub>2</sub> atmosphere, *n*-butylamine (1 mL) and Et<sub>3</sub>N (0.3 mL) were added dropwise to the mixture at room temperature, the mixture was stirred and refluxed for 25 h. After the reaction was finished, the mixture was cooled down to room temperature, and the solvent was evaporated under reduced pressure. The crude product was purified by column chromatography (silica gel, DCM:PE = 1:1, v/v) to give a pink solid (95 mg, yield: 83%).

## 2. Molecular Structure Characterization Data

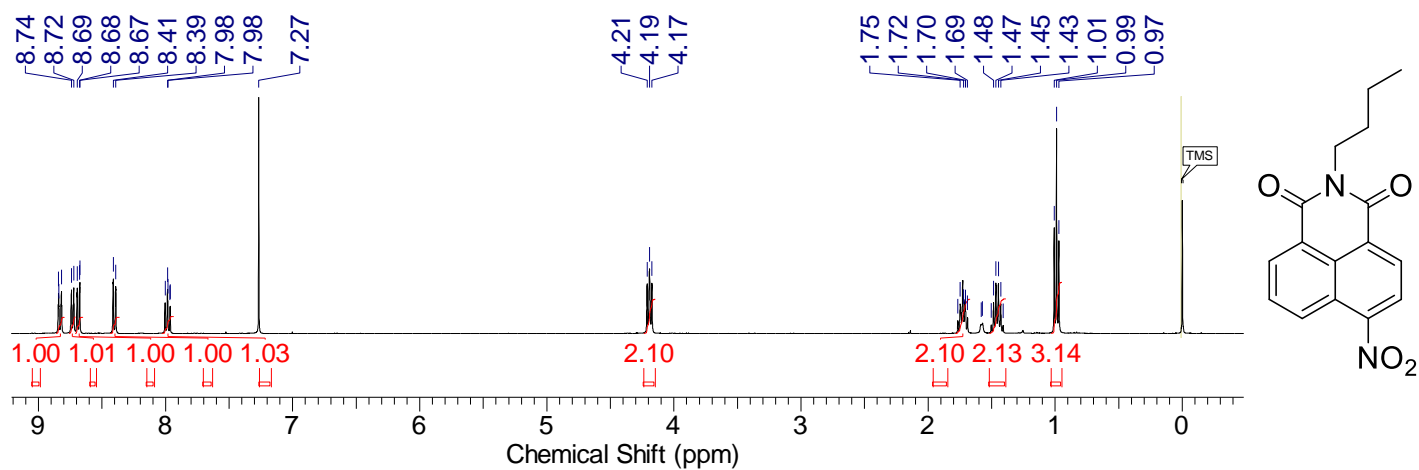

**Fig. S1** <sup>1</sup>H NMR spectrum of **3** (400 MHz, CDCl<sub>3</sub>).

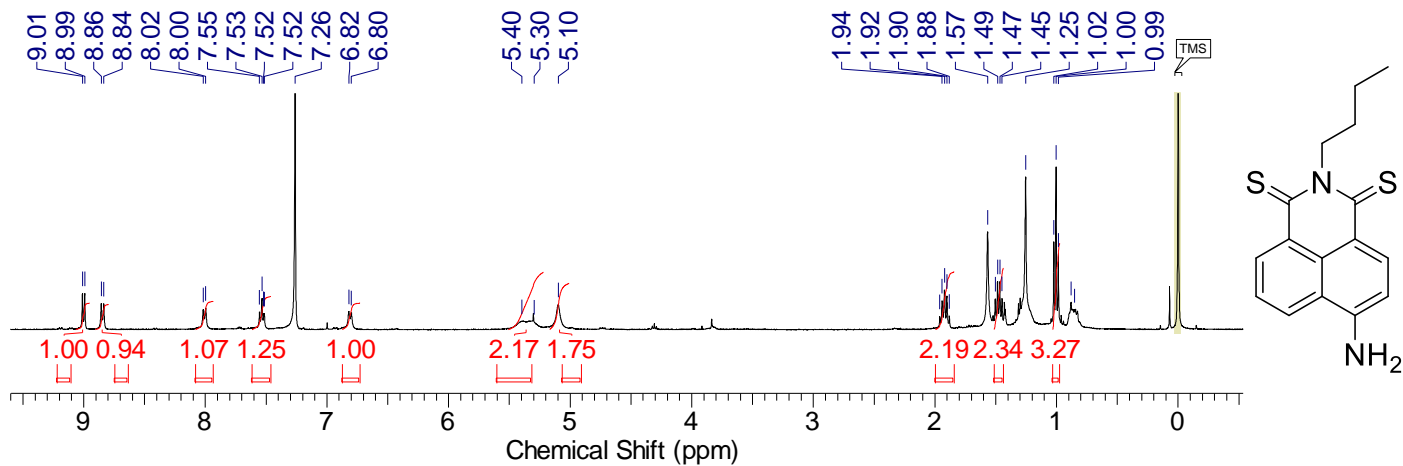

**Fig. S2** <sup>1</sup>H NMR spectrum of **NIS-NH<sub>2</sub>** (400 MHz, CDCl<sub>3</sub>).

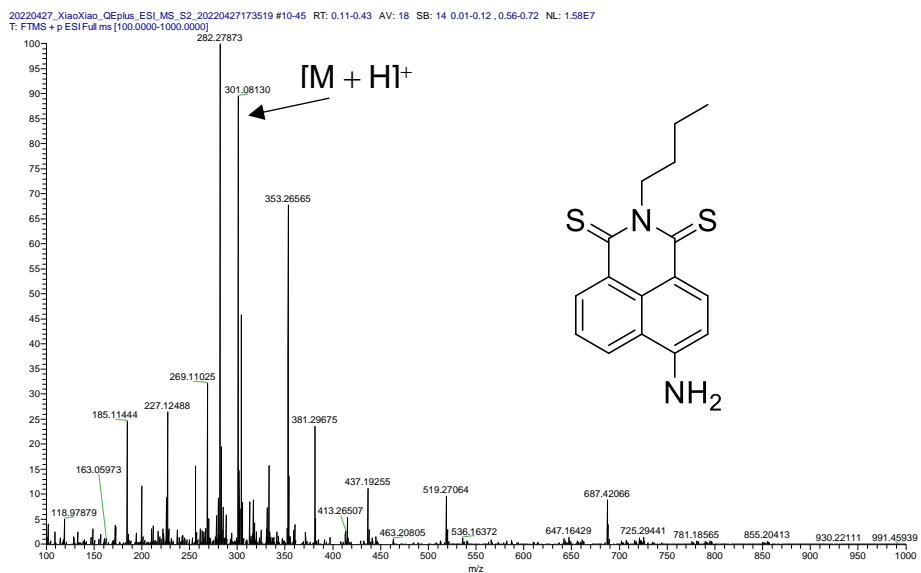

**Fig. S3** ESI-HRMS of **NIS-NH<sub>2</sub>**.

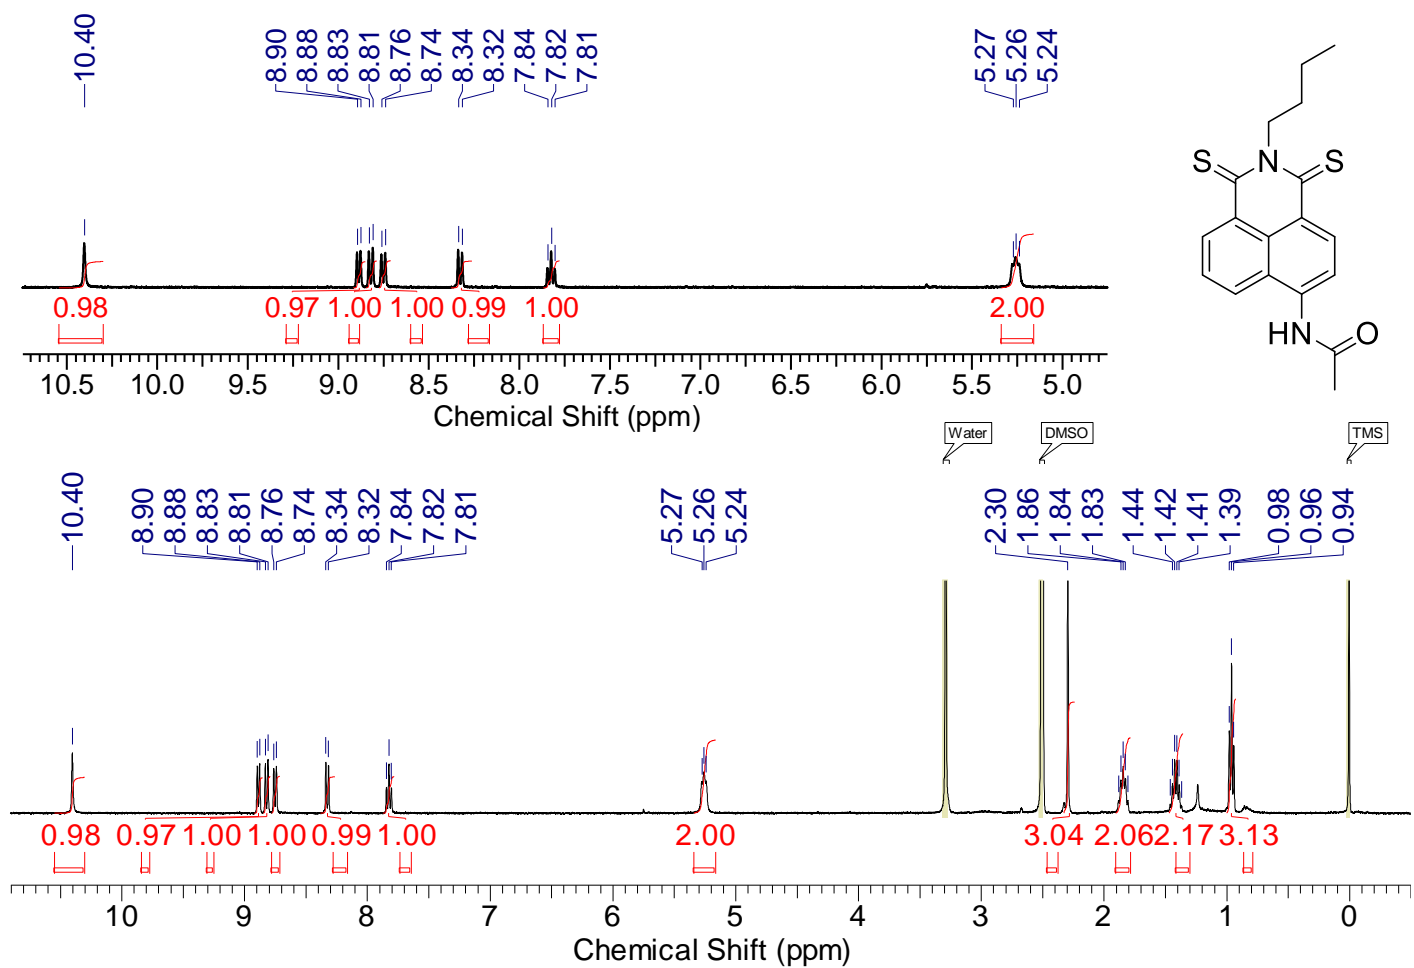

**Fig. S4**  $^1\text{H}$  NMR spectrum of **NIS-NHAc** (400 MHz,  $\text{DMSO-}d_6$ ).

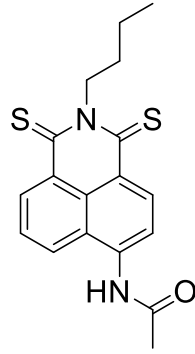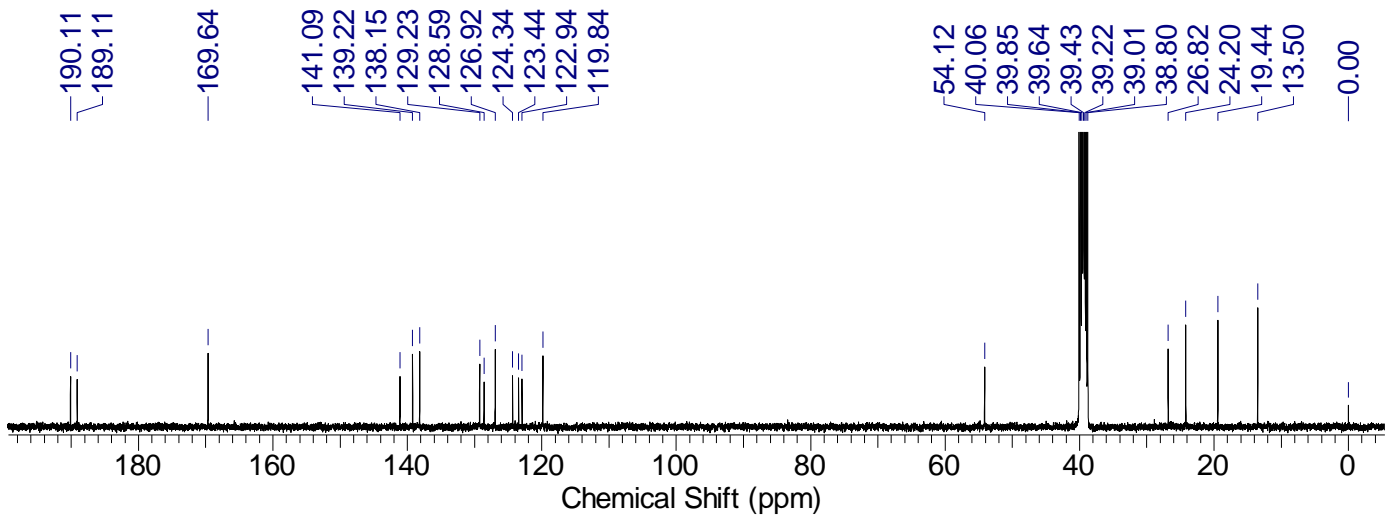

**Fig. S5**  $^{13}\text{C}$  NMR spectrum of **NIS-NHAc** (100 MHz,  $\text{DMSO-}d_6$ ).



20230712-xx-#7 RT: 0.06 AV: 1 SB: 2 0.03-0.04 NL: 9.69E5  
T: FTMS + p ESI Full ms [100.00-1000.00]

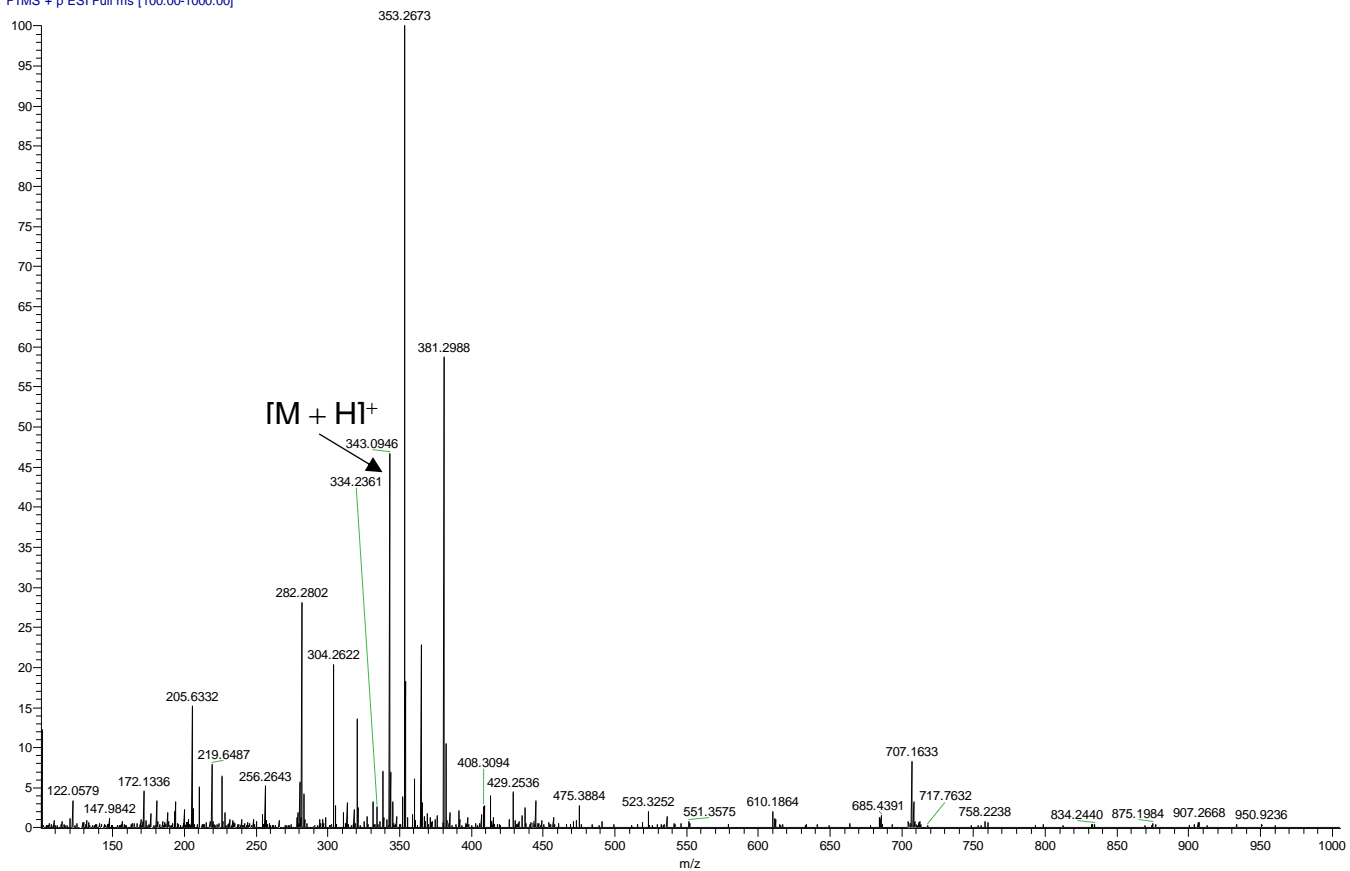

Fig. S6 ESI-HRMS of NIS-NHAc.

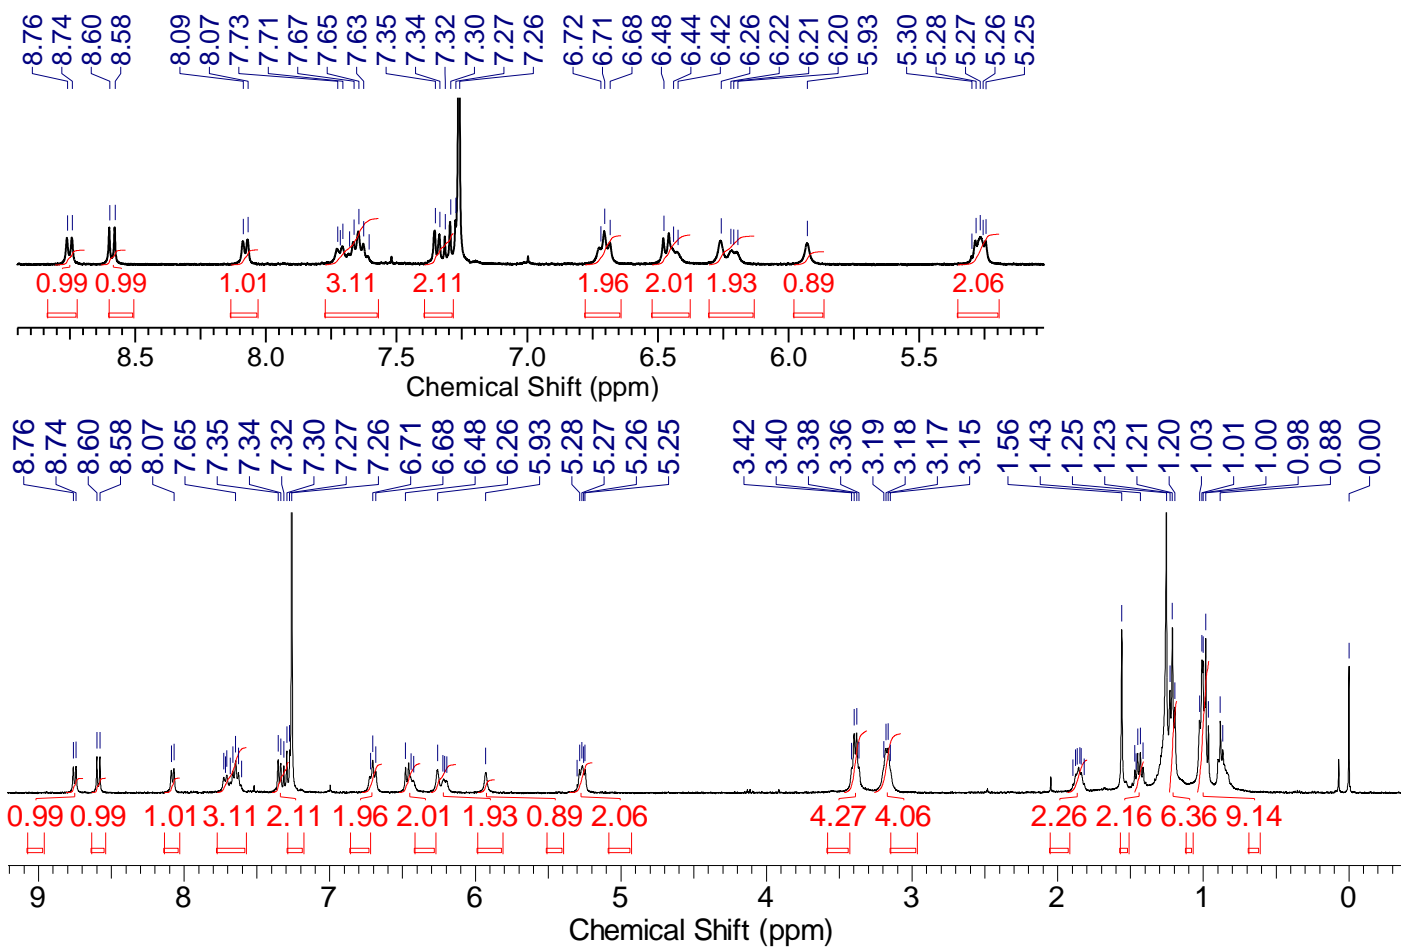

**Fig. S7**  $^1\text{H}$  NMR spectrum of **Rho-NIS** (400 MHz,  $\text{CDCl}_3$ ).

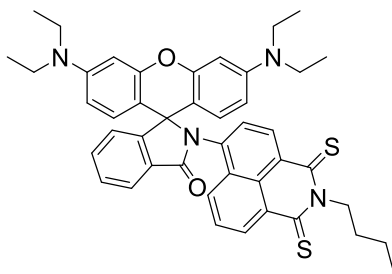

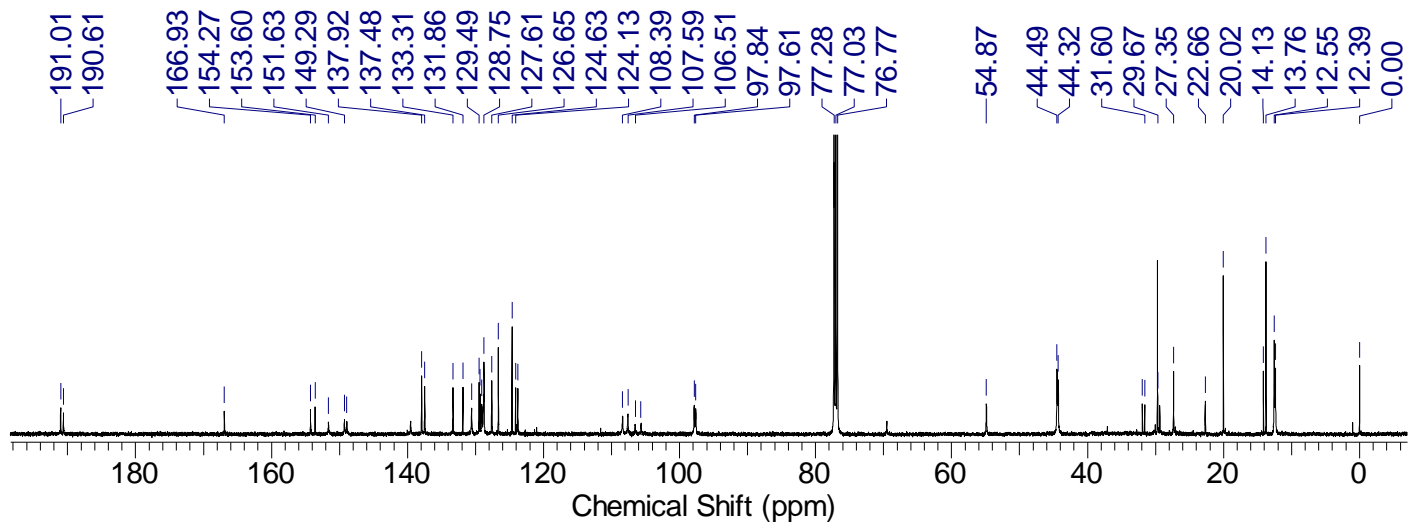

**Fig. S8**  $^{13}\text{C}$  NMR spectrum of **Rho-NIS** (125 MHz,  $\text{CDCl}_3$ ).

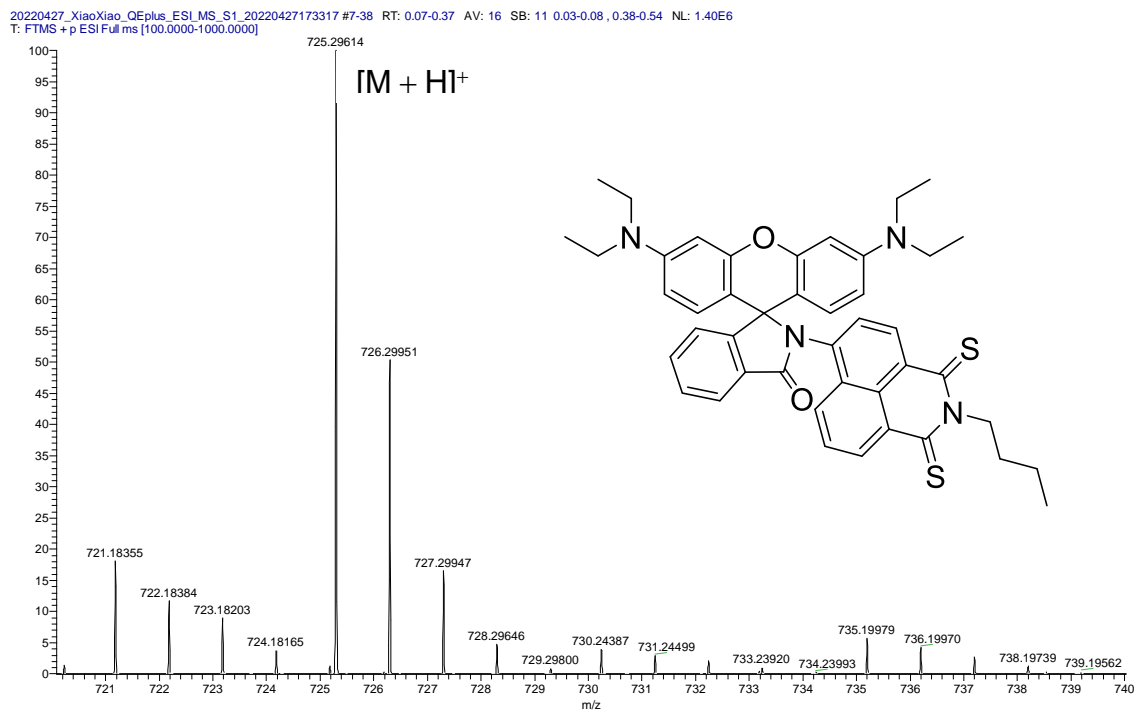

**Fig. S9** ESI-HRMS of **Rho-NIS**.

### 3. Crystallographic Data

**Table S1.** Crystallographic data of **Rho-NIS** and **NIS-NHAc**

| Compound                            | <b>Rho-NIS</b>                                                               | <b>NIS-NHAc</b>                                                |
|-------------------------------------|------------------------------------------------------------------------------|----------------------------------------------------------------|
| CCDC number                         | 2294224                                                                      | 2294222                                                        |
| Empirical formula                   | C <sub>44</sub> H <sub>44</sub> N <sub>4</sub> O <sub>4</sub> S <sub>2</sub> | C <sub>18</sub> H <sub>18</sub> N <sub>2</sub> OS <sub>2</sub> |
| Formula weight                      | 724.95                                                                       | 342.46                                                         |
| Colour                              | red                                                                          | red                                                            |
| Temperature (K)                     | 120                                                                          | 120                                                            |
| Wavelength (Å)                      | 0.71073                                                                      | 0.71073                                                        |
| Crystal system                      | triclinic                                                                    | triclinic                                                      |
| Space group                         | P-1                                                                          | P-1                                                            |
| a (Å)                               | 10.1465                                                                      | 9.2114                                                         |
| b (Å)                               | 12.0918                                                                      | 13.4808                                                        |
| c (Å)                               | 16.0775                                                                      | 14.5200                                                        |
| α (deg)                             | 71.168                                                                       | 76.969                                                         |
| β (deg)                             | 85.399                                                                       | 75.035                                                         |
| γ (deg)                             | 83.566                                                                       | 72.648                                                         |
| Volume (Å <sup>3</sup> )            | 1853.15                                                                      | 1640.93                                                        |
| Z                                   | 2                                                                            | 4                                                              |
| D <sub>x</sub> / g·cm <sup>-3</sup> | 1.299                                                                        | 1.386                                                          |
| F (000)                             | 768.0                                                                        | 720.0                                                          |
| μ / mm <sup>-1</sup>                | 0.188                                                                        | 0.330                                                          |
| Data completeness                   | 0.997                                                                        | 0.998                                                          |
| Absorption correction               | None                                                                         | None                                                           |
| Goodness of fit on F <sup>2</sup>   | 1.014                                                                        | 1.025                                                          |
| <i>R</i>                            | 0.0712                                                                       | 0.0551                                                         |
| ω <i>R</i> <sub>2</sub>             | 0.1931                                                                       | 0.1465                                                         |

#### 4. UV–Vis Absorption and Fluorescence Emission Spectra

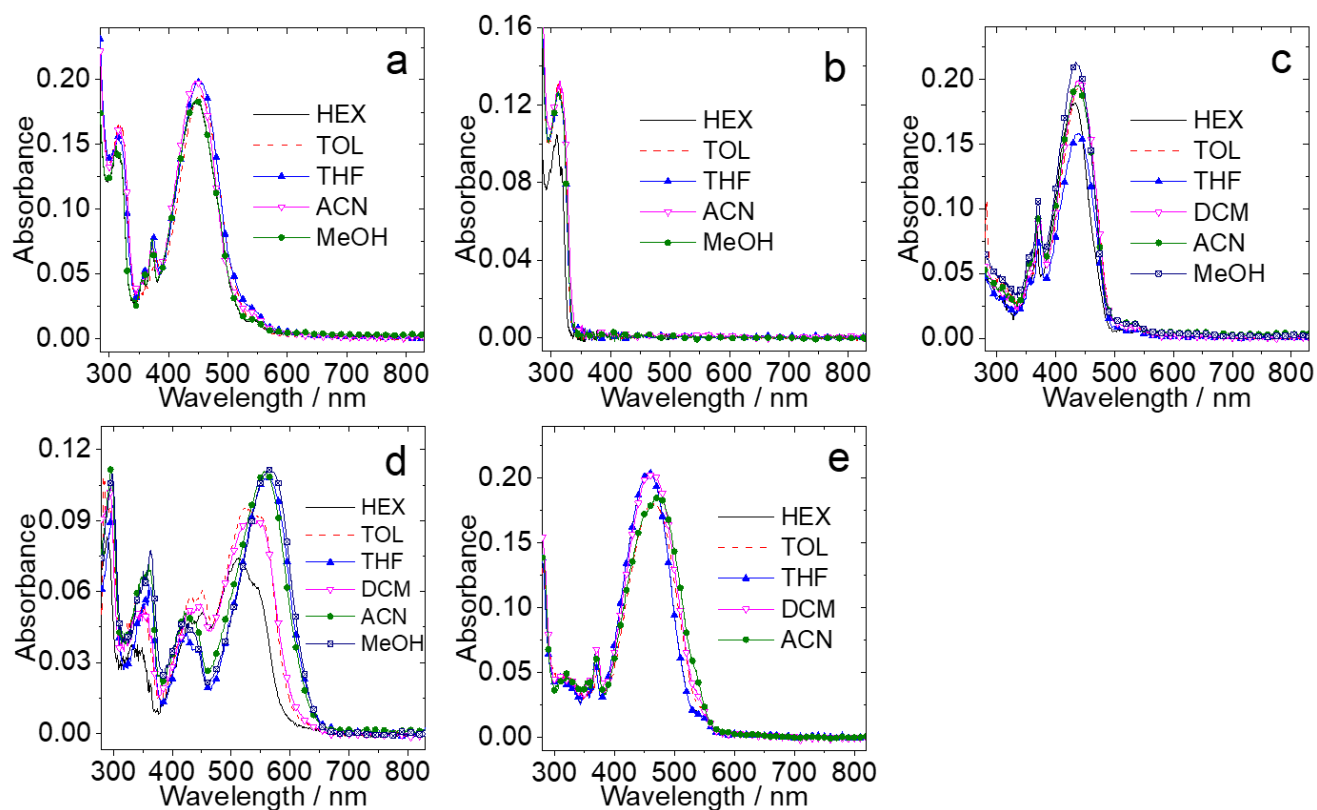

**Fig. S10** UV–vis absorption spectra of the compounds (a) **Rho-NIS**, (b) **Rho**, (c) **NIS**, (d) **NIS-NH<sub>2</sub>** and (e) **NIS-NHAc** in different solvents.  $c = 1.0 \times 10^{-5}$  M. 25 °C.

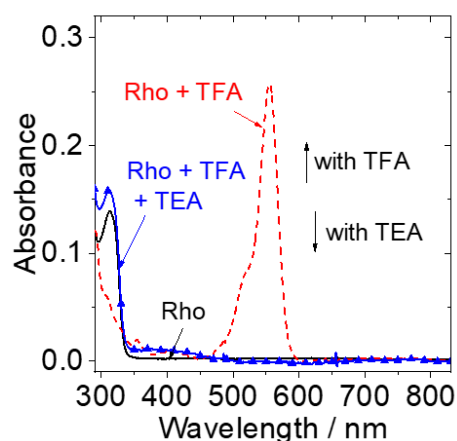

**Fig. S11** UV–vis absorption spectra of **Rho** with addition of TFA ( $c = 40 \mu\text{M}$ ) or TEA (neat, 10  $\mu\text{L}$ ) in MeOH.  $c = 1.0 \times 10^{-5}$  M. 25 °C.

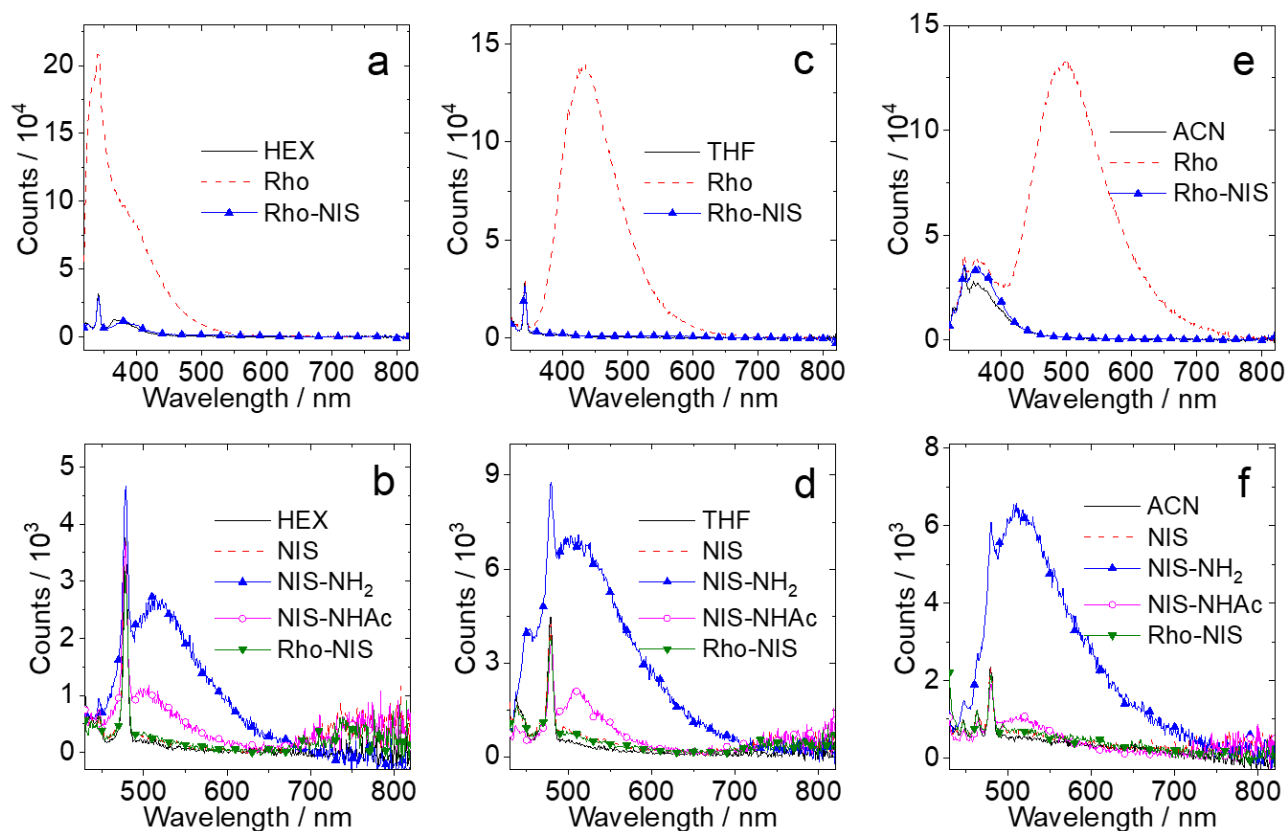

**Fig. S12** Fluorescence emission spectra of the compounds in (a,b) HEX, (c,d) THF and (e,f) ACN. Top:  $\lambda_{\text{ex}} = 310 \text{ nm}$ ; Bottom:  $\lambda_{\text{ex}} = 420 \text{ nm}$ . Optically matched solutions were used (all the solution shows the same absorbance at the excitation wavelength,  $A_{\text{ex}} = 0.1$ ). \* stands for the Raman scattering peak of the solvent. 25 °C.

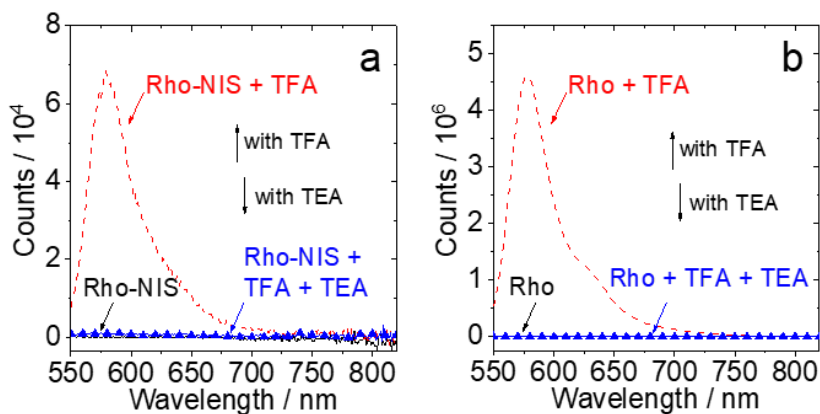

**Fig. S13** Fluorescence emission spectra of (a) **Rho-NIS** in TOL and (b) **Rho** in MeOH with addition of TFA ( $c = 40 \mu\text{M}$ ) or TEA (neat, 10  $\mu\text{L}$ ).  $\lambda_{\text{ex}} = 540 \text{ nm}$ .  $c = 1.0 \times 10^{-5} \text{ M}$ . 25 °C.

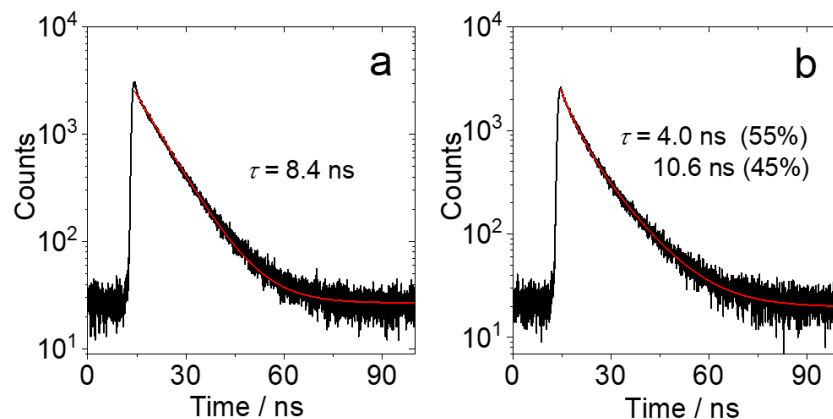

**Fig. S14** Fluorescence decay traces of **NIS-NH<sub>2</sub>** at 515 nm in (a) TOL and (b) ACN.  $\lambda_{\text{ex}} = 445$  nm,  $c = 3.0 \times 10^{-5}$  M, 25 °C.

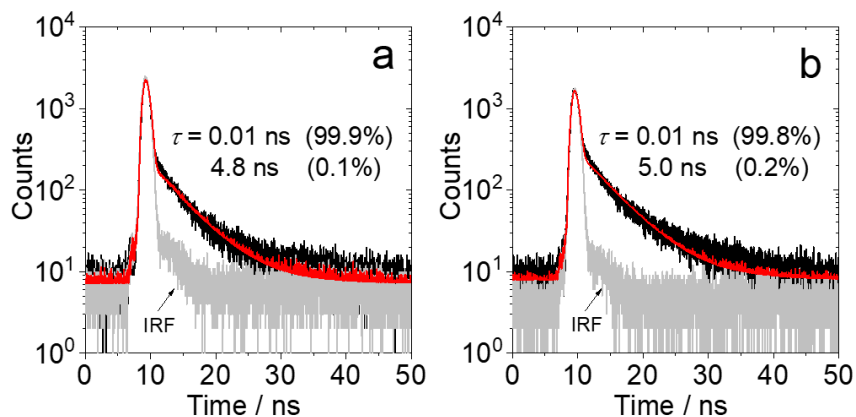

**Fig. S15** Fluorescence decay traces of **NIS-NHAc** at 505 nm in (a) TOL and (b) ACN.  $\lambda_{\text{ex}} = 445$  nm,  $c = 3.0 \times 10^{-5}$  M, 25 °C.

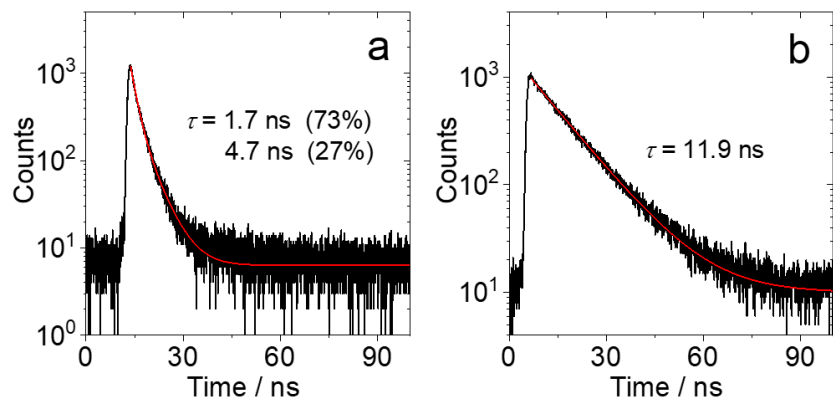

**Fig. S16** Fluorescence decay traces of **Rho** (a) at 390 nm in TOL and (b) at 500 nm in ACN.  $\lambda_{\text{ex}} = 340$  nm,  $c = 3.0 \times 10^{-5}$  M, 25 °C.

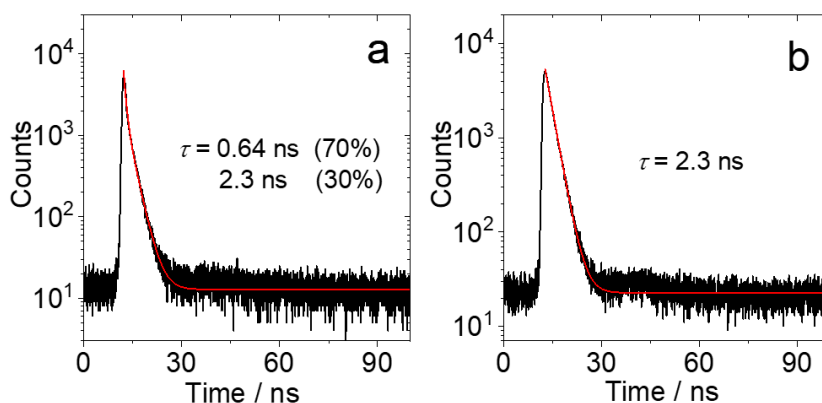

**Fig. S17** Fluorescence decay traces of (a) **Rho-NIS** and (b) **Rho** at 578 nm with addition of TFA ( $c = 40$   $\mu$ M) in MeOH.  $\lambda_{\text{ex}} = 510$  nm,  $c = 1.0 \times 10^{-5}$  M, 25 °C.

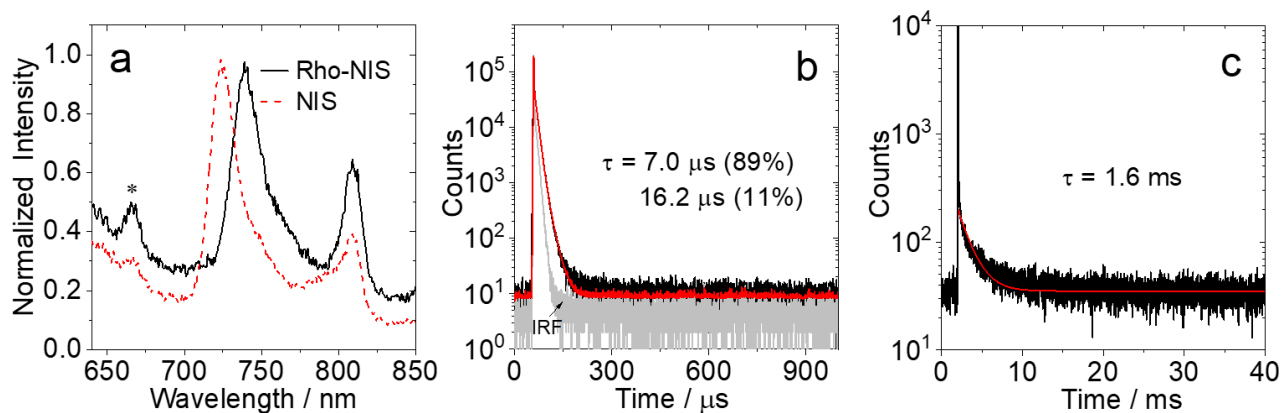

**Fig. S18** (a) Normalized phosphorescence spectra of **Rho-NIS** and **NIS**. The corresponding phosphorescence decay traces of (b) **Rho-NIS** at 740 nm and (c) **NIS** at 725 nm at 77 K in MeTHF. \* stands for the luminescence of MeTHF at 77 K.  $\lambda_{\text{ex}} = 445$  nm,  $c = 1.0 \times 10^{-4}$  M.



## 5. Electrochemical Studies

For the eqs (2)– (5), where  $\Delta G_S$  is the static Coulombic energy,  $\Delta G_{CS}^0$  is the Gibbs free-energy change of charge separation process  $\Delta G_{CR}^0$  is the Gibbs free-energy change of charge recombination process and  $E_{CSS}$  is the energy levels of the charge separated state.  $e$  is the electronic charge,  $E_{OX}$  is the half-wave potential for one-electron oxidation of the electron-donor unit,  $E_{RED}$  is the half-wave potential for one-electron reduction of the electron-acceptor unit,  $E_{00}$  is the approximated energy UV – Vis absorption at the singlet excited state in HEX,  $\epsilon_S$  is the static dielectric constant of the solvent,  $R_{CC}$  is the center-to-center separation distance between the electron donor (rhodamine) and electron acceptor (naphthalenediimide), determined by DFT optimization of the geometry,  $R_D$  is the radius of the electron donor,  $R_A$  is the radius of the electron acceptor,  $\epsilon_{REF}$  is the static dielectric constant of the solvent used for the electrochemical studies,  $\epsilon_0$  is permittivity of free space. The solvents used in the calculation of free energy of the electron transfer is HEX ( $\epsilon_S = 1.88$ ), TOL ( $\epsilon_S = 2.38$ ), THF ( $\epsilon_S = 7.39$ ), DCM ( $\epsilon_S = 8.93$ ) and ACN ( $\epsilon_S = 37.5$ ).

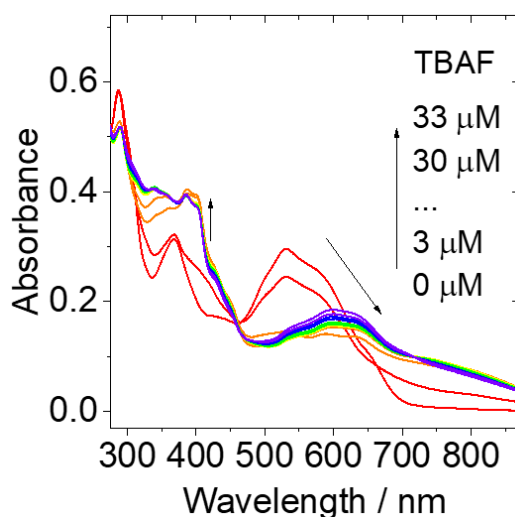

**Fig. S19** UV-vis absorption spectra of **NIS-NH<sub>2</sub>** chemically reduced with tetrabutylammonium fluoride (TBAF) used to generate **[NIS-NH<sub>2</sub>]<sup>•-</sup>** in deaerated DMF.  $c = 3.0 \times 10^{-5}$  M. 25 °C.

## 6. Femtosecond Transient Absorption Spectra

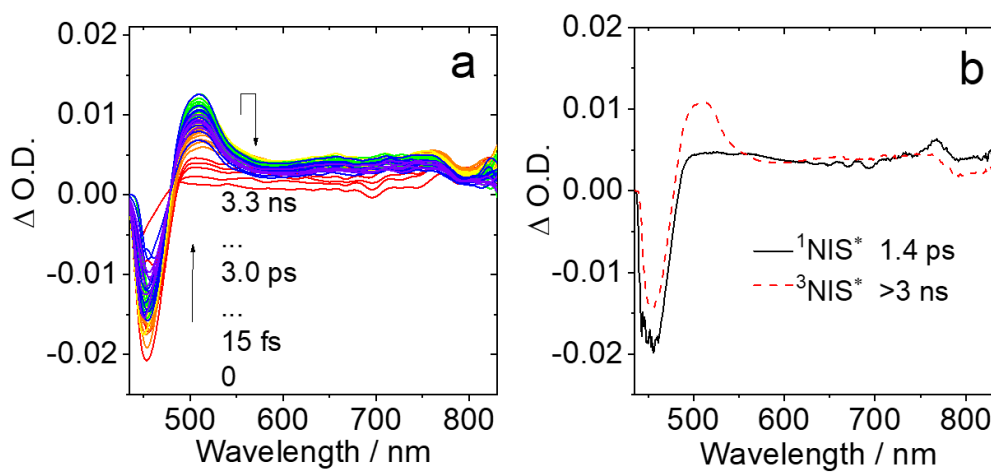

**Fig. S20** (a) Femtosecond transient absorption spectra of **NIS** and (b) the related evolution associated difference spectra (EADS) of **NIS** obtained from target analysis with the sequential model in ACN.  $\lambda_{ex} = 355$  nm.  $c = 1.0 \times 10^{-4}$  M, 25 °C.

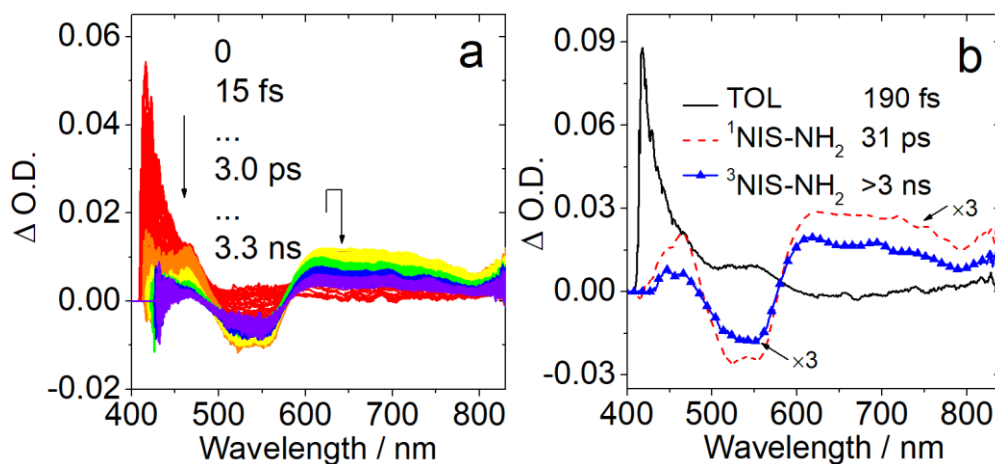

**Fig. S21** (a) Femtosecond transient absorption spectra of **NIS-NH<sub>2</sub>** and (b) the related evolution associated difference spectra (EADS) of **NIS-NH<sub>2</sub>** obtained from target analysis with the sequential model in TOL.  $\lambda_{ex} = 355$  nm.  $c = 1.0 \times 10^{-4}$  M, 25 °C.

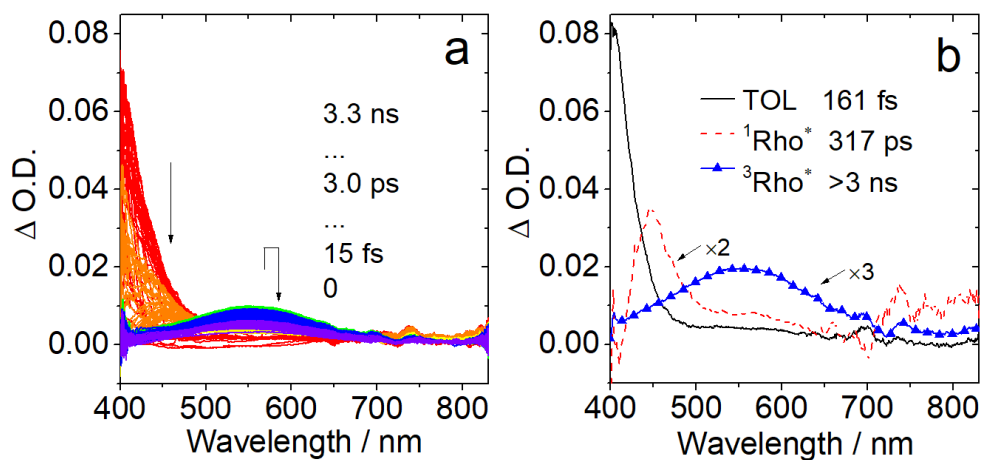

**Fig. S22** (a) Femtosecond transient absorption spectra of **Rho** and (b) the related evolution associated difference spectra (EADS) of **Rho** obtained from target analysis with the sequential model in TOL.  $\lambda_{\text{ex}} = 355 \text{ nm}$ .  $c = 1.0 \times 10^{-4} \text{ M}$ ,  $25 \text{ }^\circ\text{C}$ .

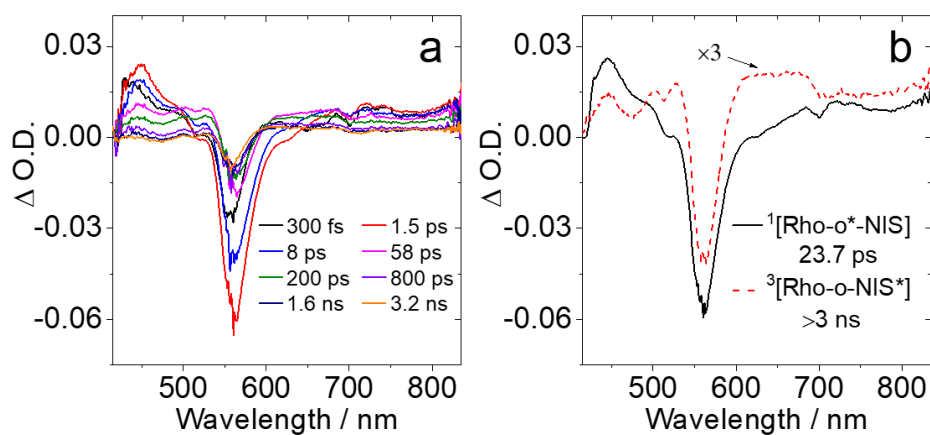

**Fig. S23** (a) Femtosecond transient absorption spectra of **Rho-NIS** in the presence of TFA and (b) the related evolution associated difference spectra (EADS) obtained from target analysis with the sequential model in TOL.  $\lambda_{\text{ex}} = 355 \text{ nm}$ .  $c[\text{Rho-NIS}] = 1.0 \times 10^{-4} \text{ M}$ ,  $c[\text{TFA}] = 5.0 \times 10^{-4} \text{ M}$ ,  $25 \text{ }^\circ\text{C}$ .

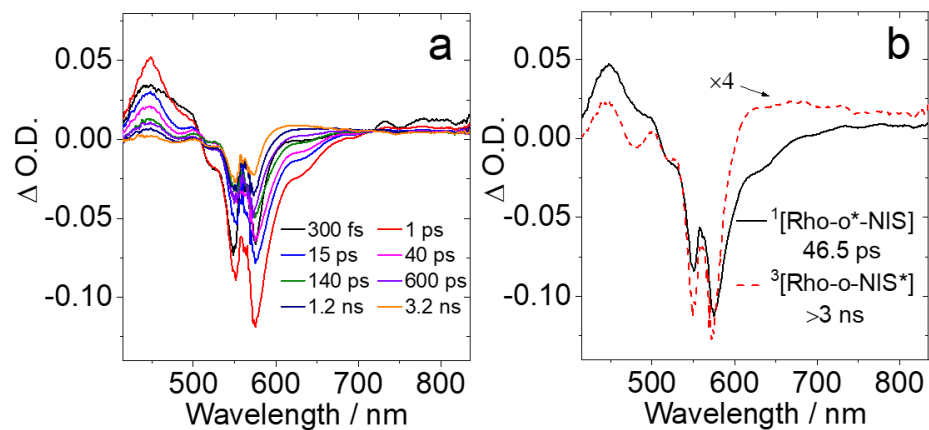

**Fig. S24** (a) Femtosecond transient absorption spectra of **Rho-NIS** in the presence of TFA and (b) the related evolution associated difference spectra (EADS) obtained from target analysis with the sequential model in MeOH.  $\lambda_{\text{ex}} = 355 \text{ nm}$ .  $c[\text{Rho-NIS}] = 1.0 \times 10^{-4} \text{ M}$ ,  $c[\text{TFA}] = 5.0 \times 10^{-4} \text{ M}$ ,  $25 \text{ }^\circ\text{C}$ .

## 7. Nanosecond Transient Absorption Spectra

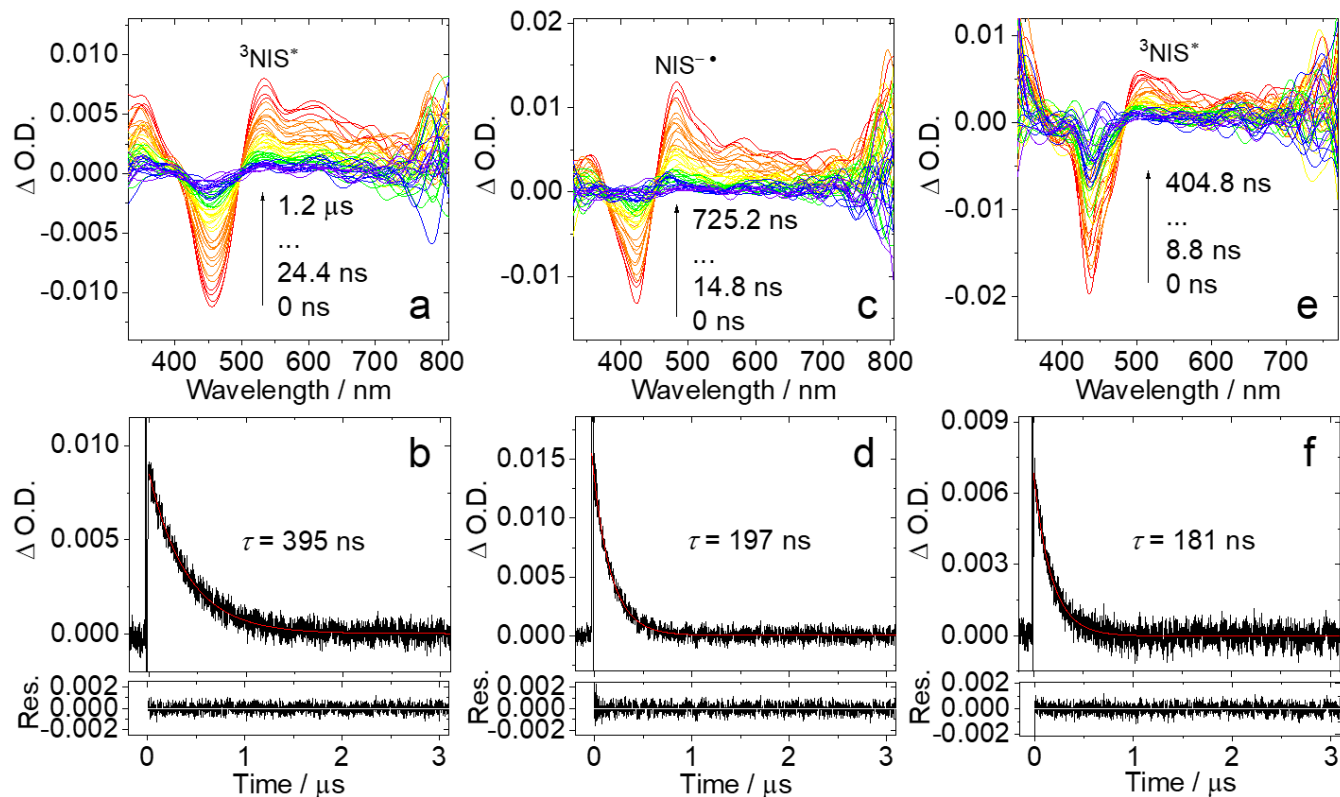

**Fig. S25** Nanosecond transient absorption spectra of **Rho-NIS** in deaerated (a) TOL and (c) ACN. The decay traces of **Rho-NIS** in deaerated (b) TOL at 540 nm and (d) ACN at 480 nm excited with nanosecond pulsed laser.  $\lambda_{\text{ex}} = 420$  nm. (e) Nanosecond transient absorption spectra of **NIS** and (f) the decay trace of **NIS** at 510 nm in deaerated TOL excited with nanosecond pulsed laser.  $\lambda_{\text{ex}} = 440$  nm.  $c = 3.0 \times 10^{-5}$  M, 25 °C.

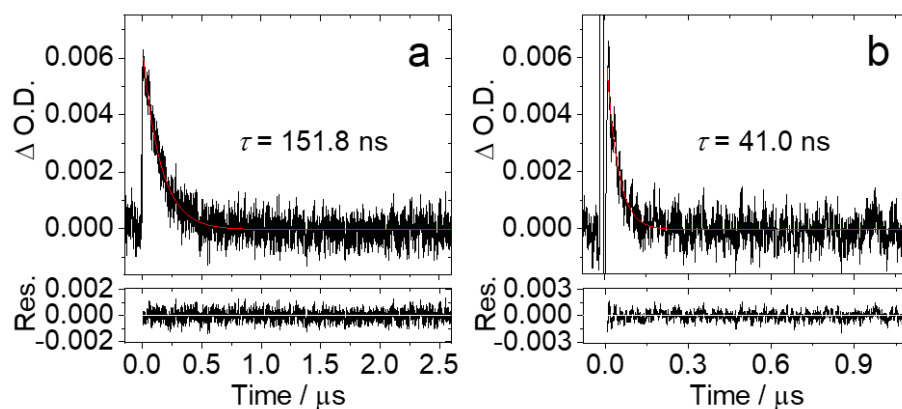

**Fig. S26** The decay traces of **Rho-NIS** in aerated (a) TOL at 540 nm and (b) ACN at 480 nm excited with nanosecond pulsed laser.  $\lambda_{\text{ex}} = 440$  nm.  $c = 3.0 \times 10^{-5}$  M, 25 °C.

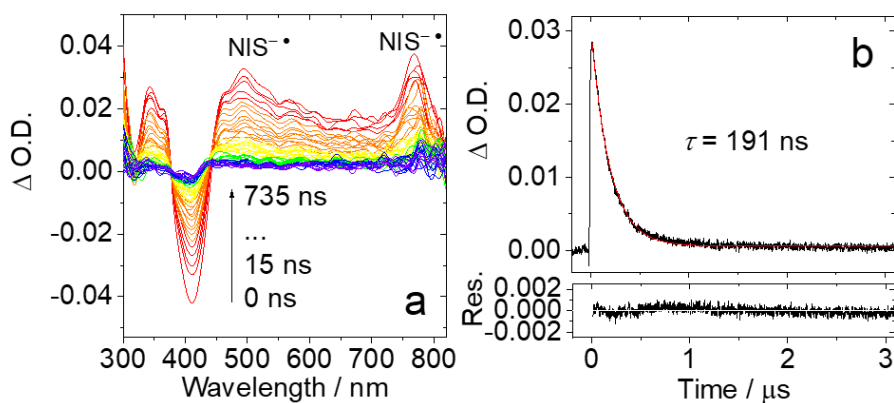

**Fig. S27** (a) Nanosecond transient absorption spectra of **Rho-NIS** in deaerated MeOH and (b) the corresponding decay traces at 480 nm excited with nanosecond pulsed laser.  $\lambda_{\text{ex}} = 355$  nm.  $c = 4.0 \times 10^{-5}$  M.

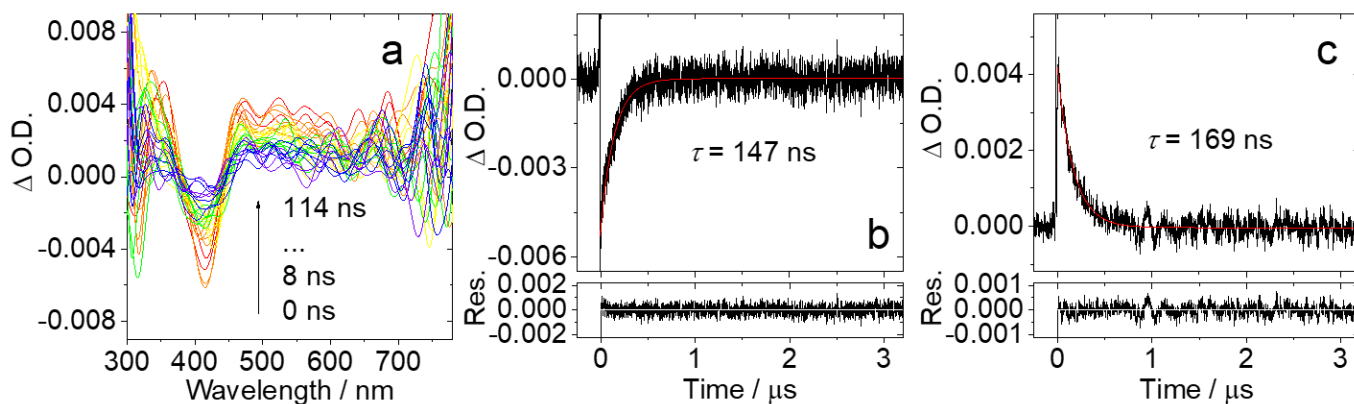

**Fig. S28** (a) Nanosecond transient absorption spectra of **Rho-NIS** and the corresponding decay trace at (b) 420 nm and (c) 475 nm in deaerated MeOH excited with nanosecond pulsed laser.  $\lambda_{\text{ex}} = 440 \text{ nm}$ .  $c = 3.0 \times 10^{-5} \text{ M}$ , 25 °C.

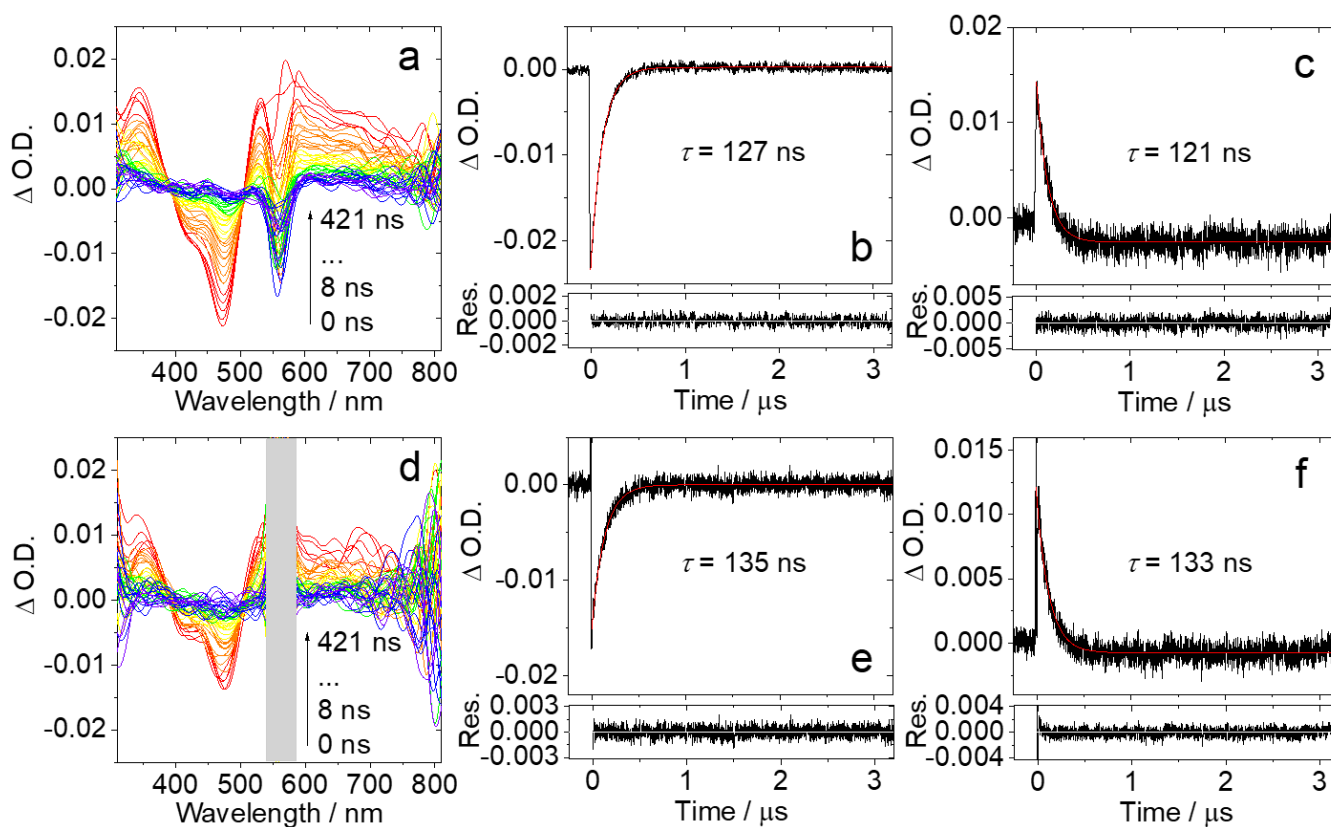

**Fig. S29** (a, d) Nanosecond transient absorption spectra of **Rho-NIS** with addition of TFA ( $c = 40 \mu\text{M}$ ) and the corresponding decay trace at (b, e) 470 nm and (c, f) 540 nm in deaerated MeOH excited with nanosecond pulsed laser. Top:  $\lambda_{\text{ex}} = 560 \text{ nm}$ ; Bottom:  $\lambda_{\text{ex}} = 450 \text{ nm}$ .  $c = 1.0 \times 10^{-5} \text{ M}$ , 25 °C.

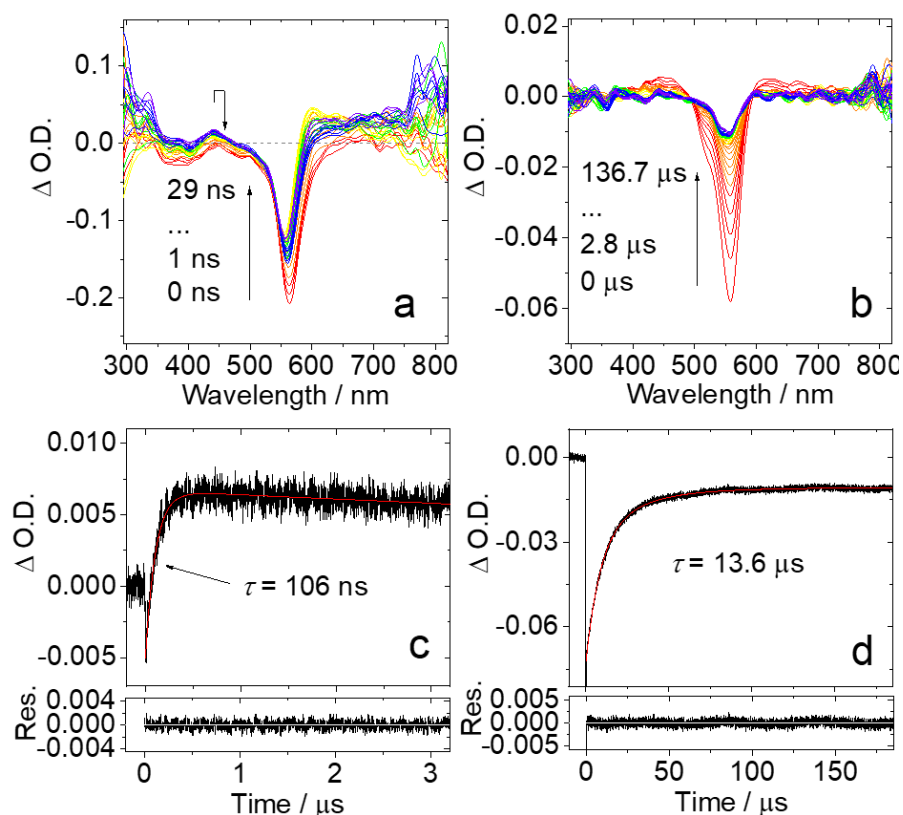

**Fig. S30** Nanosecond transient absorption spectra of **Rho-NIS** with addition of **TFA** ( $c = 40 \mu\text{M}$ ) in deaerated **MeOH** in (a) short and (b) long timescale. The corresponding decay traces at (c) 470 nm and (d) 560 nm in deaerated **MeOH** excited with nanosecond pulsed laser.  $\lambda_{\text{ex}} = 355 \text{ nm}$ .  $c = 1.0 \times 10^{-5} \text{ M}$ . 25 °C.

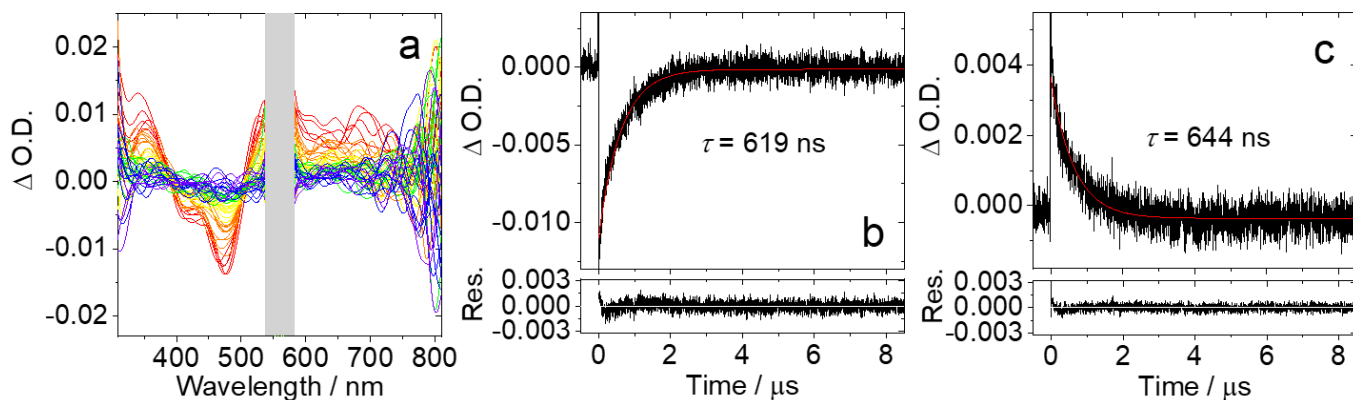

**Fig. S31** (a) Nanosecond transient absorption spectra of **Rho-NIS** with addition of **TFA** ( $c = 40 \mu\text{M}$ ) and the corresponding decay trace at (b) 470 nm and (c) 540 nm in deaerated **TOL** excited with nanosecond pulsed laser.  $\lambda_{\text{ex}} = 450 \text{ nm}$ .  $c = 1.0 \times 10^{-5} \text{ M}$ , 25 °C.



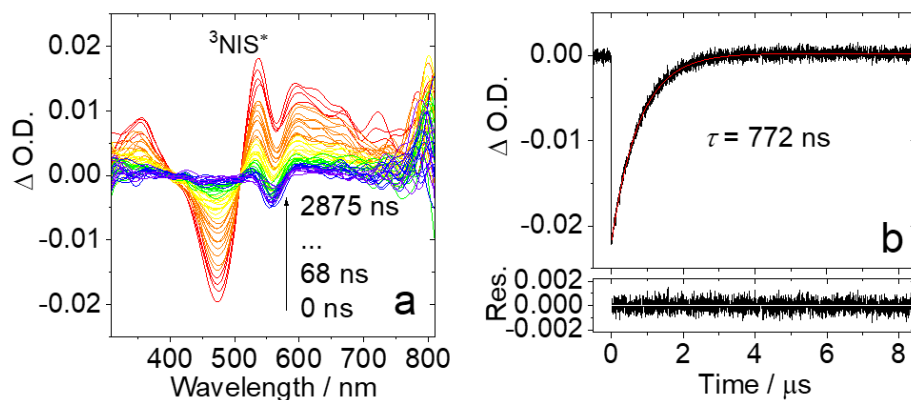

**Fig. S32** (a) Nanosecond transient absorption spectra of **Rho-NIS** with addition of **TFA** ( $c = 40 \mu\text{M}$ ) and (b) the corresponding decay trace at 470 nm in deaerated **TOL** excited with nanosecond pulsed laser.  $\lambda_{\text{ex}} = 560 \text{ nm}$ .  $c = 1.0 \times 10^{-5} \text{ M}$ .  $25 \text{ }^\circ\text{C}$ .

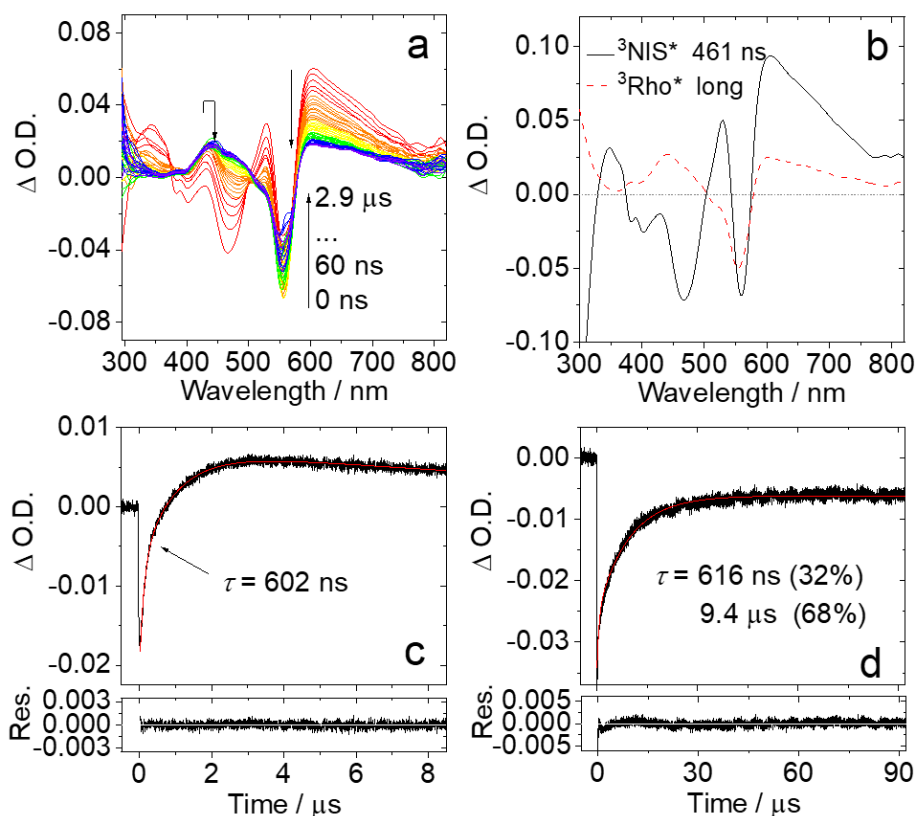

**Fig. S33** (a) Nanosecond transient absorption spectra of **Rho-NIS** with addition of **TFA** ( $c = 40 \mu\text{M}$ ). (b) The related evolution-associated difference spectrum (EADS) obtained from target analysis with the sequential model. And the decay traces at (c) 470 nm and (d) 560 nm in deaerated **TOL** excited with nanosecond pulsed laser.  $\lambda_{\text{ex}} = 355 \text{ nm}$ .  $c = 1.0 \times 10^{-5} \text{ M}$ .  $25 \text{ }^\circ\text{C}$ .

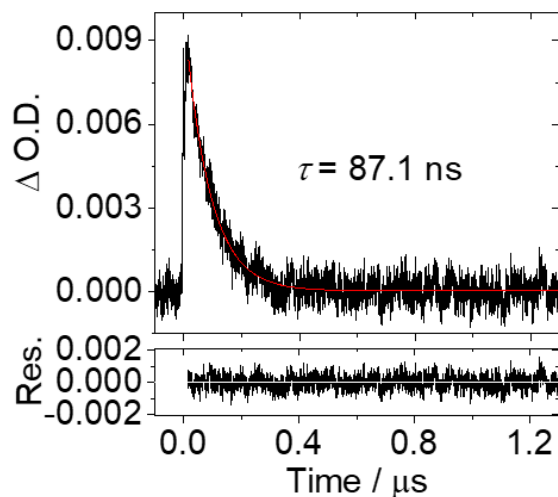

**Fig. S34** The decay trace of **NIS** at 520 nm in aerated TOL excited with nanosecond pulsed laser.  $\lambda_{ex} = 355 \text{ nm}$ .  $c = 4.0 \times 10^{-5} \text{ M}$ ,  $25 \text{ }^\circ\text{C}$ .

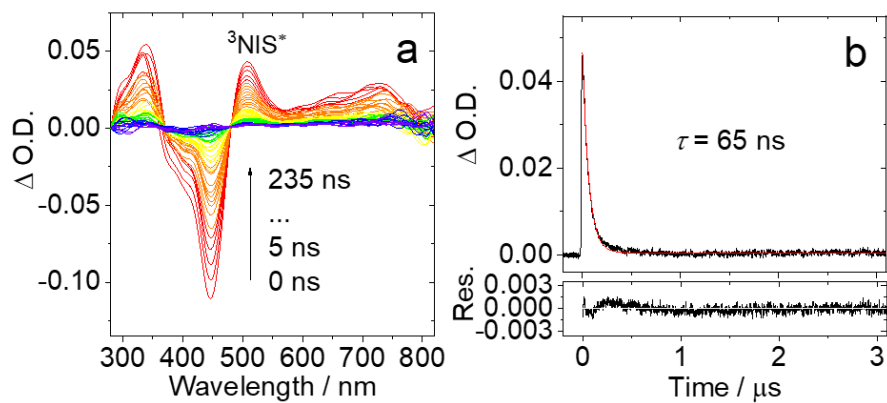

**Fig. S35.** (a) Nanosecond transient absorption spectra of **NIS** and (b) the decay trace of **NIS** at 520 nm in deaerated ACN excited with nanosecond pulsed laser.  $\lambda_{ex} = 355 \text{ nm}$ .  $c = 4.0 \times 10^{-5} \text{ M}$ ,  $25 \text{ }^\circ\text{C}$ .

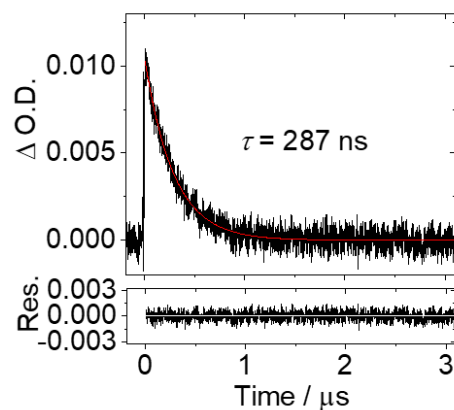

**Fig. S36** The decay traces of **NIS-NH<sub>2</sub>** in aerated **TOL** at 630 nm excited with nanosecond pulsed laser.  $\lambda_{\text{ex}} = 530 \text{ nm}$ .  $c = 2.0 \times 10^{-5} \text{ M}$ , 25 °C.

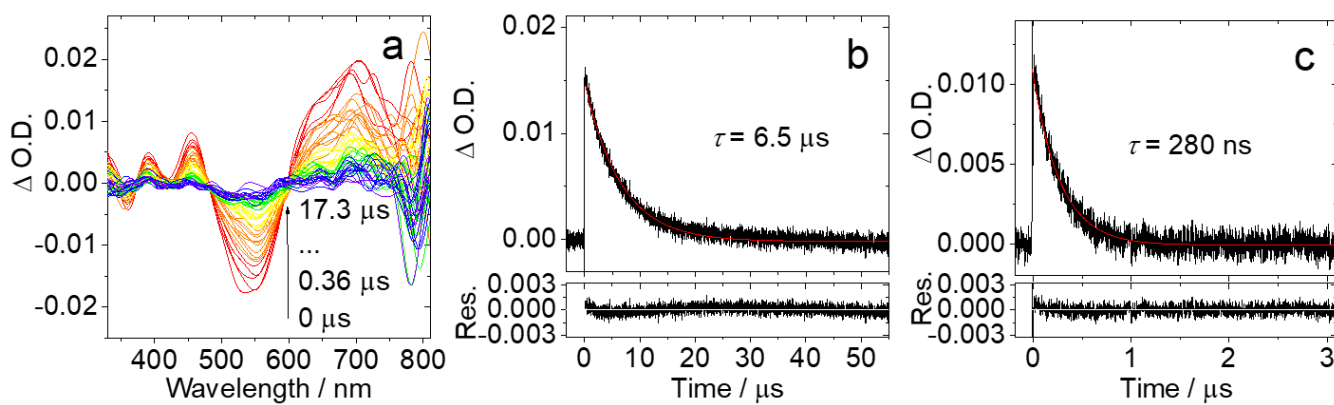

**Fig. S37** (a) Nanosecond transient absorption spectra of **NIS-NH<sub>2</sub>** in deaerated **ACN**. The decay traces of **NIS-NH<sub>2</sub>** in (b) deaerated and (c) aerated ACN at 630 nm excited with nanosecond pulsed laser.  $\lambda_{\text{ex}} = 530 \text{ nm}$ .  $c = 2.0 \times 10^{-5} \text{ M}$ , 25 °C.

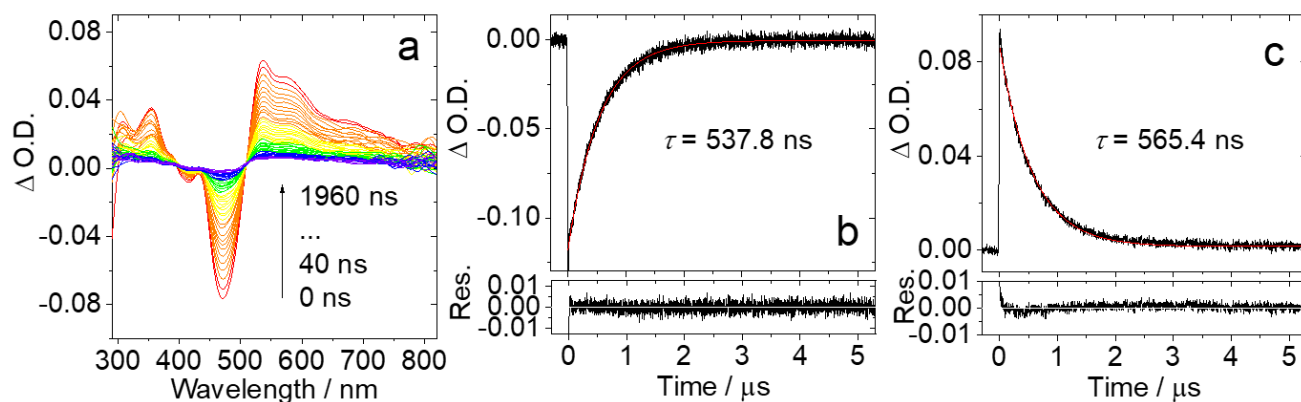

**Fig. S38** (a) Nanosecond transient absorption spectra of **NIS-NHAc** in deaerated TOL. The decay traces of **NIS-NHAc** at (b) 470 nm and (c) 530 nm in deaerated TOL excited with nanosecond pulsed laser.  $\lambda_{ex} = 355$  nm.  $c = 3.0 \times 10^{-5}$  M, 25 °C.

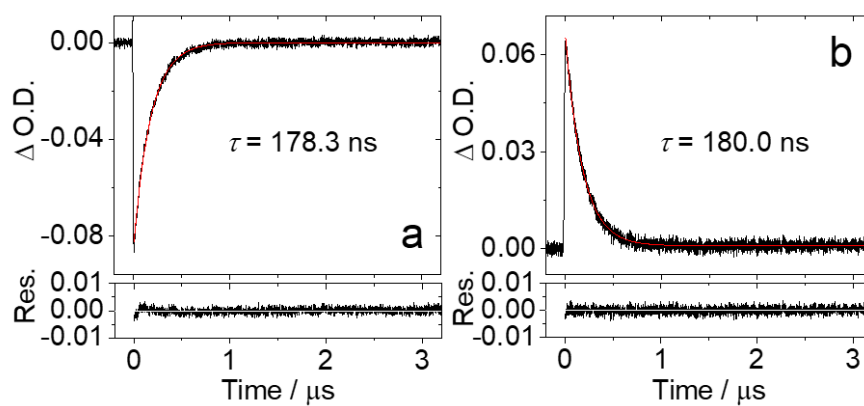

**Fig. S39** The decay traces of **NIS-NHAc** at (b) 470 nm and (c) 530 nm in aerated TOL excited with nanosecond pulsed laser.  $\lambda_{ex} = 355$  nm.  $c = 3.0 \times 10^{-5}$  M, 25 °C.

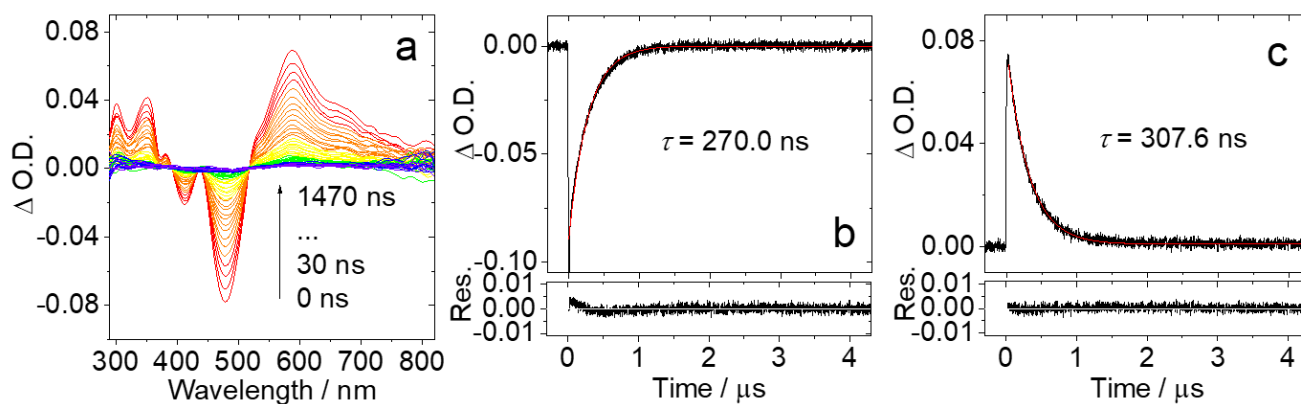

**Fig. S40** (a) Nanosecond transient absorption spectra of **NIS-NHAc** in deaerated ACN. The decay traces of **NIS-NHAc** at (b) 470 nm and (c) 590 nm in deaerated ACN excited with nanosecond pulsed laser.  $\lambda_{\text{ex}} = 355 \text{ nm}$ .  $c = 3.0 \times 10^{-5} \text{ M}$ ,  $25 \text{ }^\circ\text{C}$ .

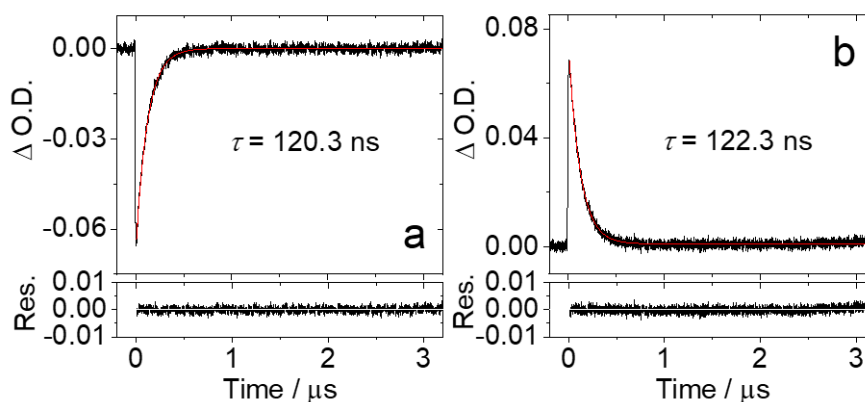

**Fig. S41** The decay traces of **NIS-NHAc** at (b) 470 nm and (c) 590 nm in aerated ACN excited with nanosecond pulsed laser.  $\lambda_{\text{ex}} = 355 \text{ nm}$ .  $c = 3.0 \times 10^{-5} \text{ M}$ ,  $25 \text{ }^\circ\text{C}$ .

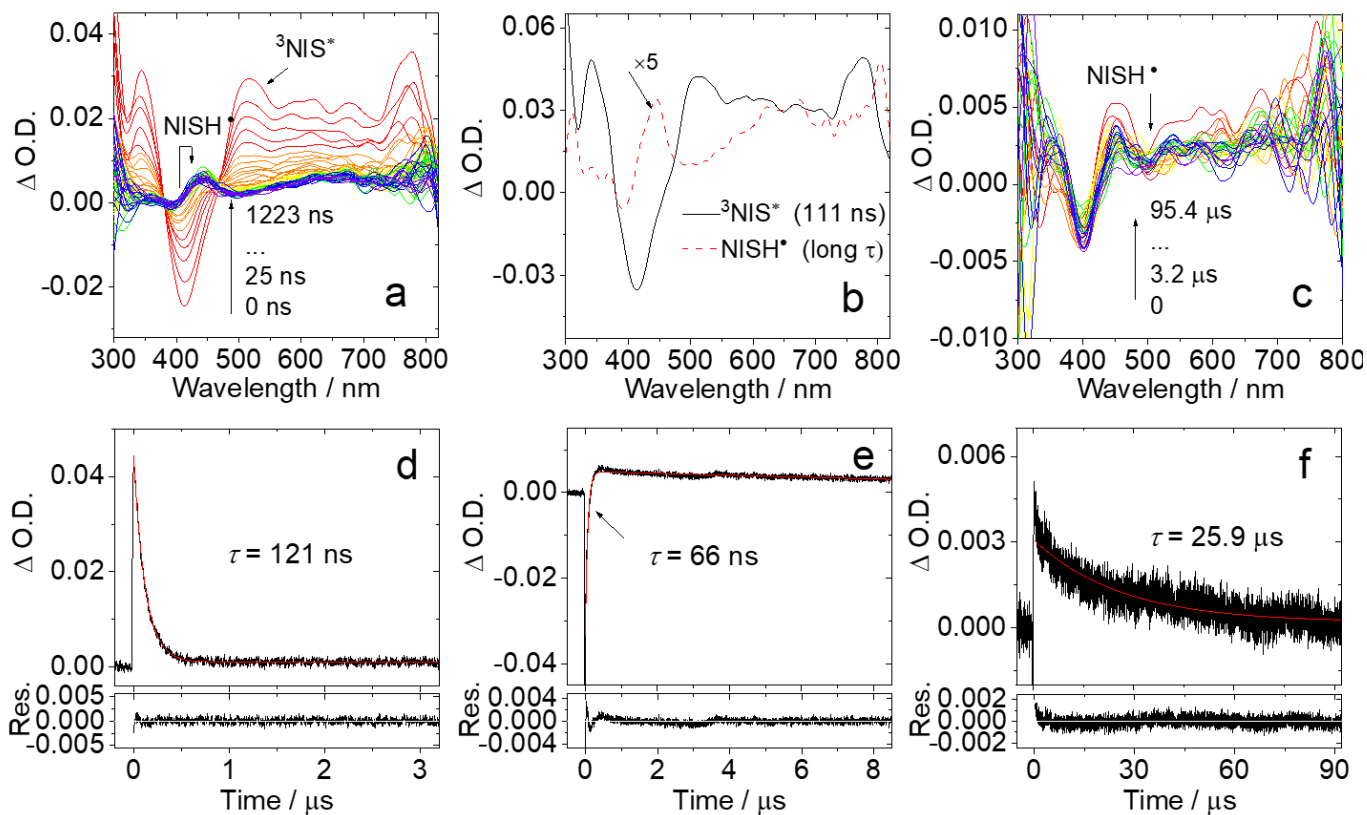

**Fig. S42** Nanosecond transient absorption spectra of **Rho-NIS** in deaerated isopropanol in (a) short and (c) long timescale. (b) The related species-associated difference spectrum (SADS) obtained from target analysis with the sequential model for NIS. (d) The decay traces of **Rho-NIS** at 520 nm, and the decay traces at 440 nm in (e) short and (f) long timescale, excited with nanosecond pulsed laser.  $\lambda_{\text{ex}} = 355$  nm.  $c = 3.0 \times 10^{-5}$  M, 25 °C.

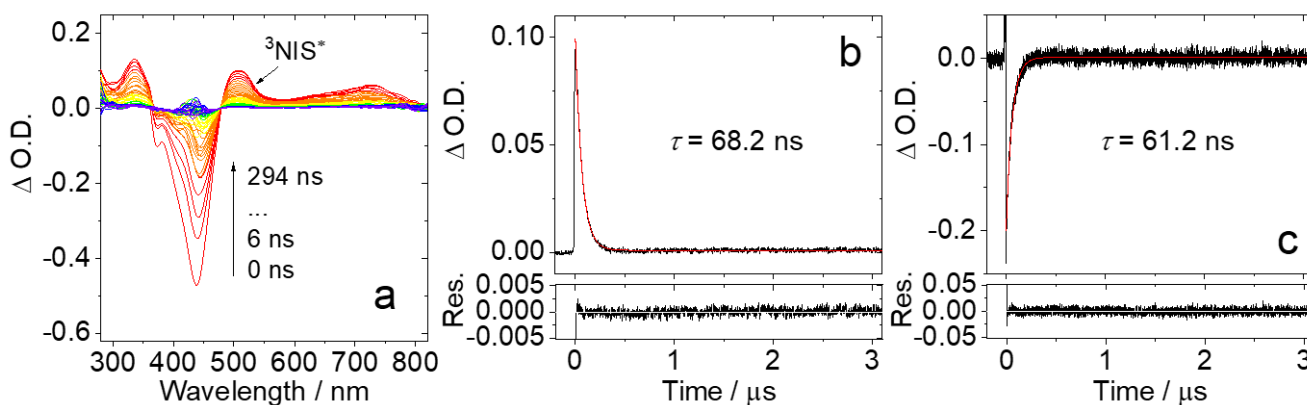

**Fig. S43** (a) Nanosecond transient absorption spectra of **NIS** in aerated isopropanol. (d) The decay traces of **NIS** at (b) 520 nm and (c) 440 nm excited with nanosecond pulsed laser.  $\lambda_{\text{ex}} = 355$  nm.  $c = 4.0 \times 10^{-5}$  M, 25 °C.

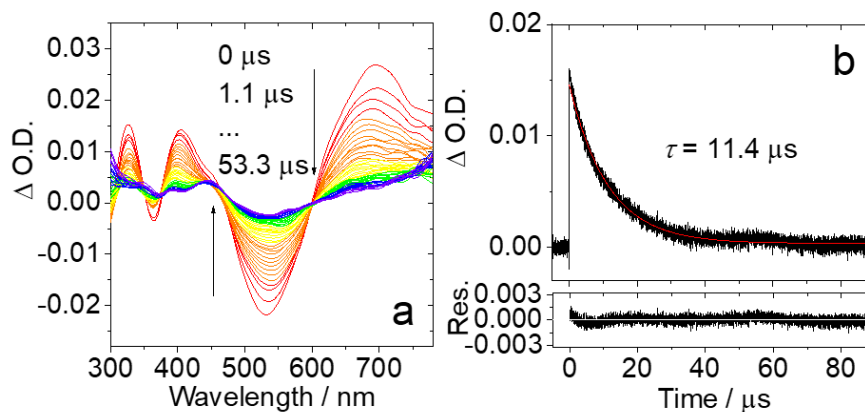

**Fig. S44** (a) Nanosecond transient absorption spectra of **NIS-NH<sub>2</sub>** and (d) the corresponding decay trace at 690 nm in deaerated isopropanol excited with nanosecond pulsed laser.  $\lambda_{\text{ex}} = 355$  nm.  $c = 3.0 \times 10^{-5}$  M, 25 °C.

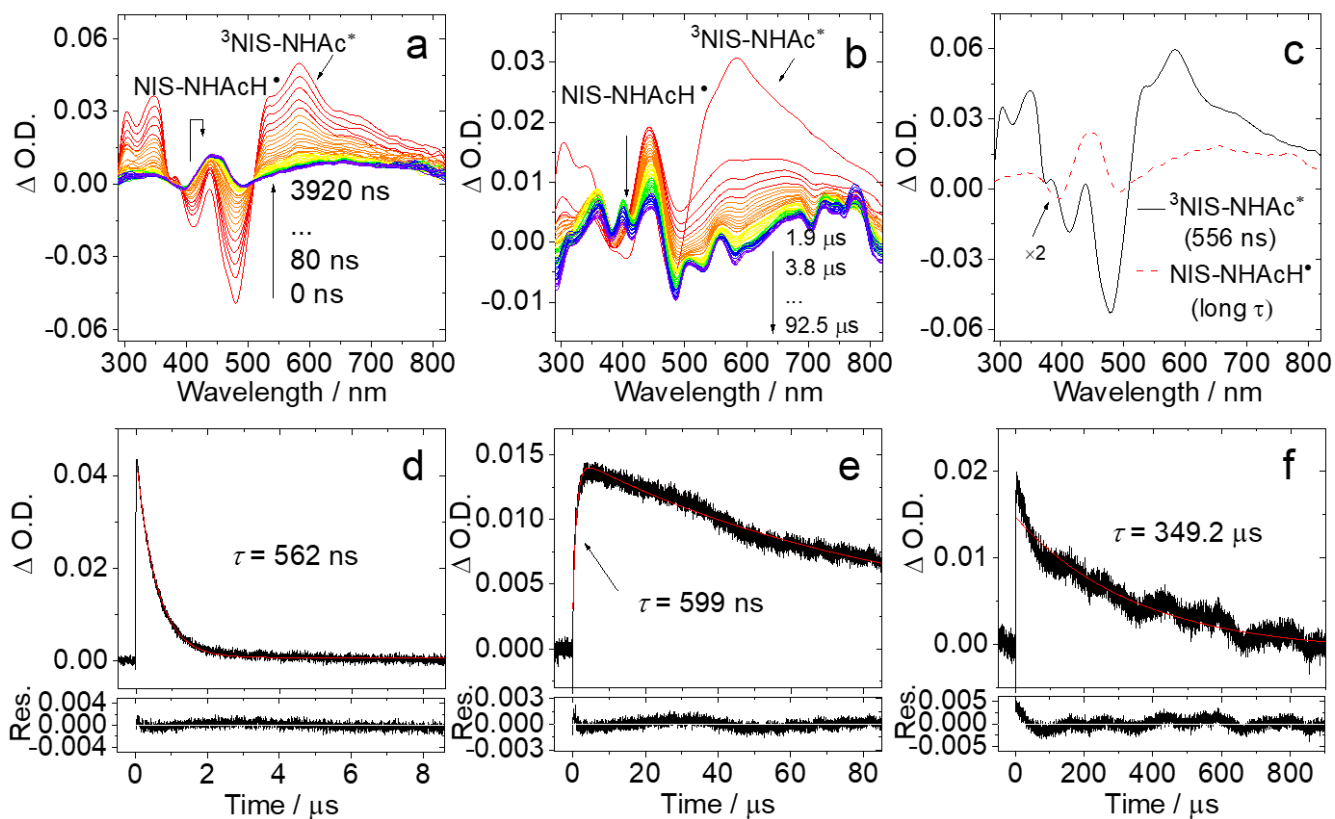

**Fig. S45** Nanosecond transient absorption spectra of **NIS-NHAc** in deaerated isopropanol in (a) short and (c) long timescale. (b) The related species-associated difference spectrum (SADS) obtained from target analysis with the sequential model for NIS. (d) The decay traces of **NIS-NHAc** at 530 nm, and the decay traces at 440 nm in (e) short and (f) long timescale, excited with nanosecond pulsed laser.  $\lambda_{ex} = 355$  nm.  $c = 3.0 \times 10^{-5}$  M, 25 °C.



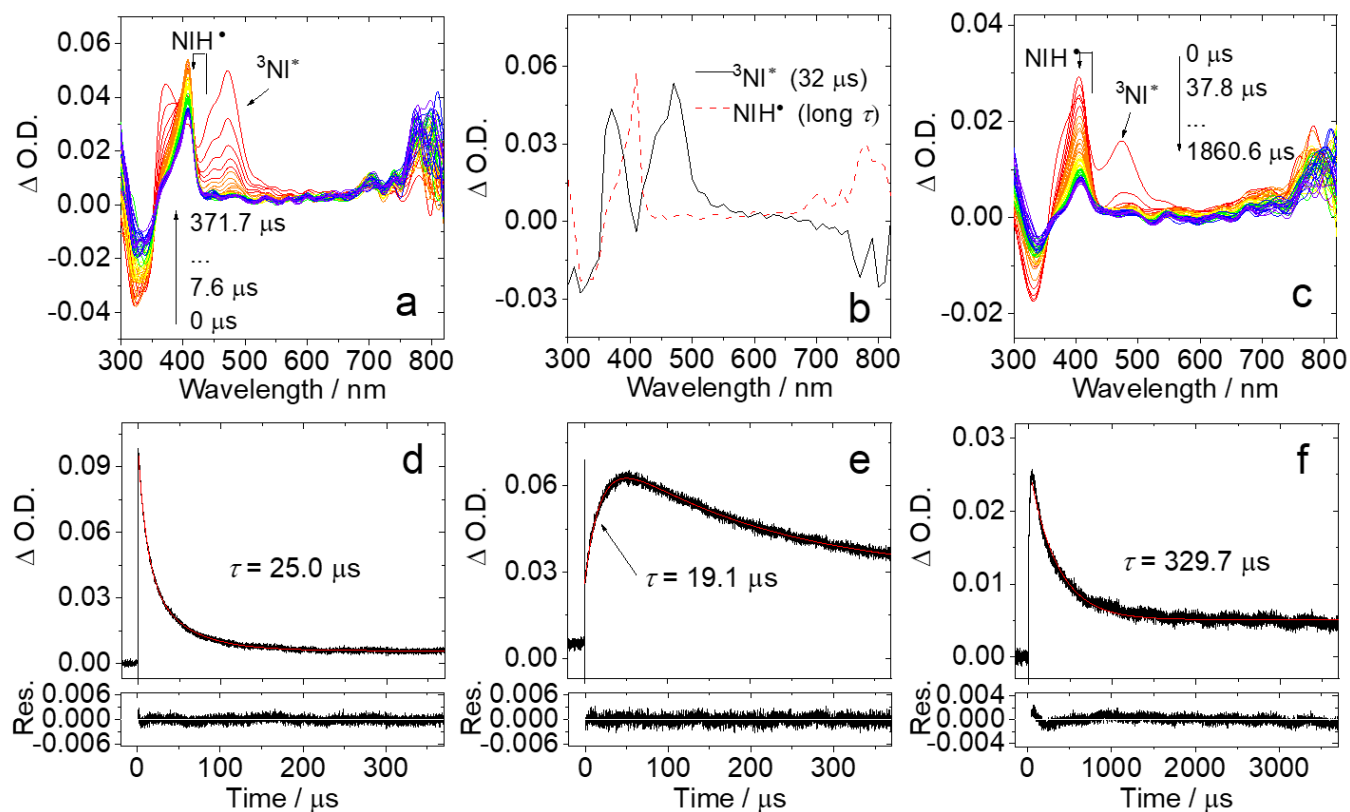

**Fig. S46** Nanosecond transient absorption spectra of **NI** in deaerated isopropanol in (a) short and (c) long timescale. (b) The related species-associated difference spectrum (SADS) obtained from target analysis with the sequential model for NIS. (d) The decay traces of **NI** at 460 nm, and the decay traces at 410 nm in (e) short and (f) long timescale, excited with nanosecond pulsed laser.  $\lambda_{\text{ex}} = 355$  nm.  $c = 3.0 \times 10^{-5}$  M, 25 °C.

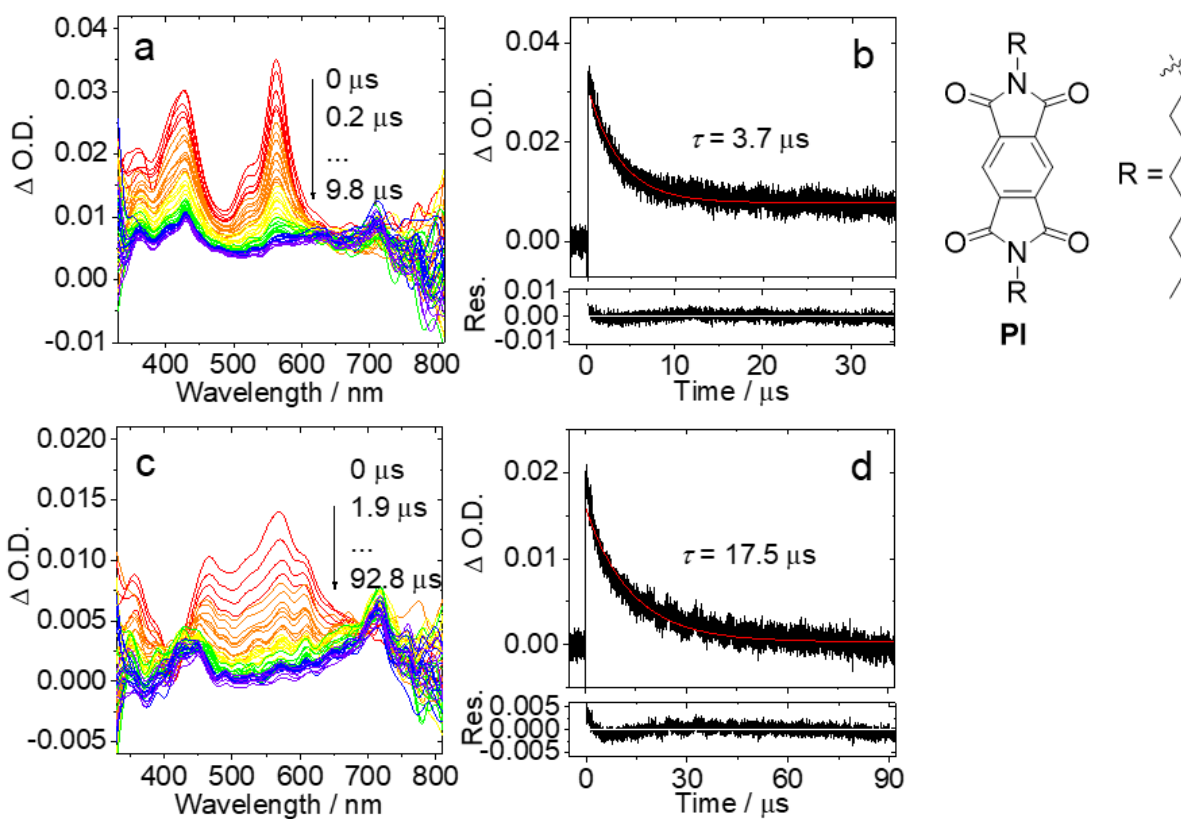

**Fig. S47** Intermolecular triplet-triplet energy transfer (TTET) with pyromellitimide (**PI**) as the triplet energy donor and **4** as the triplet energy acceptor. (a) Nanosecond transient absorption spectra of **PI** and (b) the decay trace of at 430 nm in deaerated TOL. (c) Nanosecond transient absorption spectra of the mixture of **PI** ( $c = 1 \times 10^{-4}$  M) and **4** ( $c = 5 \times 10^{-5}$  M), and (d) decay trace of the mixture at 570 nm in deaerated TOL.  $\lambda_{\text{ex}} = 355$  nm. 25 °C.

## 8. Charge Transfer Quantum Yield

The charge transfer quantum yield was calculated with equation S1:

$$\Phi_{CS} = \Phi_{std} \left( \frac{\Delta O.D._{sam}}{\Delta O.D._{std}} \right) \left( \frac{\epsilon_{std}}{\epsilon_{sam}} \right) \quad (S1)$$

Where  $\Phi_{std}$  is the triplet state quantum yield of the standard compound;  $\Delta O.D._{sam}$  and  $\Delta O.D._{std}$  are the  $\Delta O.D.$  value of the sample' s radical anion/cation and the standard compound' s excited state at the maximal absorption in transient absorption spectra, respectively (with the fact that the sample' s radical anion/cation and the standard compound' s excited state does not overlap with the ground state bleaching band as the criterion);  $\epsilon_{sam}$  and  $\epsilon_{std}$  are the molar absorption coefficient of the sample' s radical anion/cation and the standard compound' s excited state. It should be noted that the absorption of the sample and the standard compound at the excited wavelength should be kept same. Anthracene was selected as standard compound, the  $\Phi_{std}$  and  $\epsilon_{std}$  at 432 nm of the triplet state of anthracene is 71% and  $4.55 \times 10^4 \text{ M}^{-1} \text{ cm}^{-1}$ , respectively;  $\epsilon_{std}$ , i.e. the molar absorption coefficient at 418 nm of the **NIS** radical anion, is  $9.50 \times 10^3 \text{ M}^{-1} \text{ cm}^{-1}$ ; the molar absorption coefficient at 418 nm of the NI radical anion, is  $2.75 \times 10^4 \text{ M}^{-1} \text{ cm}^{-1}$ .<sup>5</sup> The excitation wavelength is 355 nm and the absorbance of the sample and the anthracene is 0.18 at 355 nm.

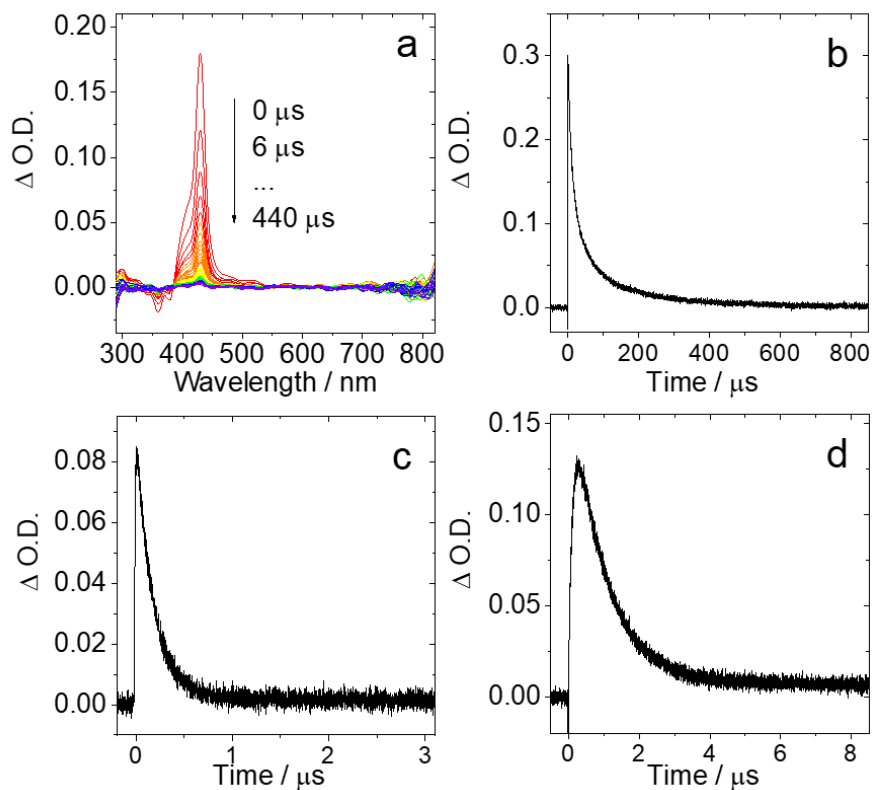

**Fig. S48** (a) Nanosecond transient absorption spectra of anthracene and (b) the decay trace at 432 nm in deaerated TOL. The decay traces of (c) **Rho-NIS** in deaerated ACN at 480 nm and (d) **Rho-NI** in deaerated HEX at 418 nm excited with nanosecond pulsed laser.  $\lambda_{ex} = 355$  nm.  $A = 0.18$  at 355 nm, 20 °C.

## 9. Time-Resolved Electron Paramagnetic Resonance (TREPR) Spectra

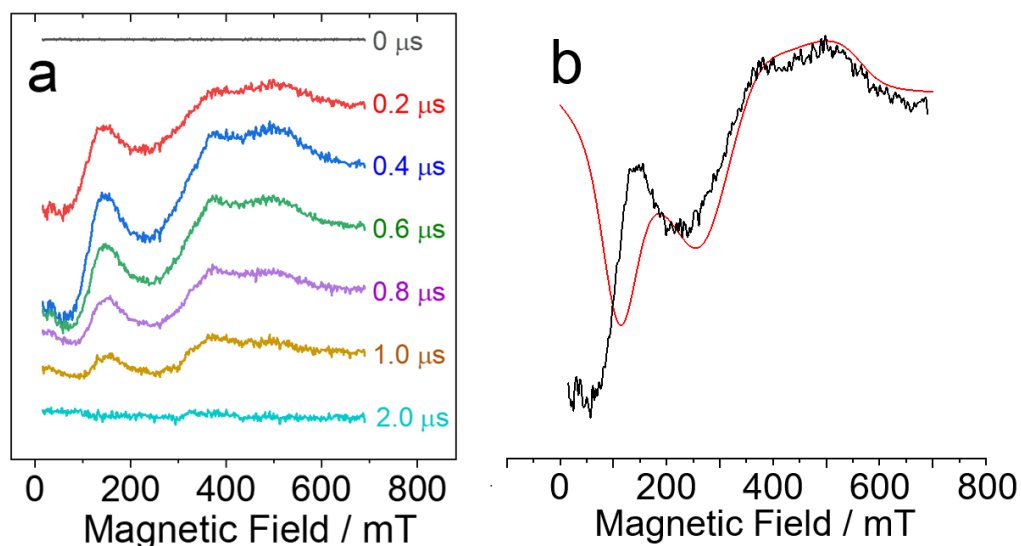

**Fig. S49** TREPR spectra of **NIS-NH<sub>2</sub>** measured with X-band spectrometer excited with 450 nm laser with energy 1 mJ per pulse (a) at different delay time and (b) at 0.2  $\mu\text{s}$  in TOL/2-MeTHF (1:3, v/v) at 80 K. Simulation (red curve in b) was performed with EasySpin package. Simulation parameters are the same as for simulation spectrum in Q-band.  $c = 1.0 \times 10^{-4}$  M.

The forbidden transition of **NIS-NH<sub>2</sub>** is observed in weak fields of the TREPR spectrum in the X-band. The width, intensity and position of the theoretical spectrum differs from the experimental one. Agreement can be improved by increasing the width of this signal, or by assuming that the narrow signal is superimposed on the wide signal in the null fields.

## 10. DFT Calculations

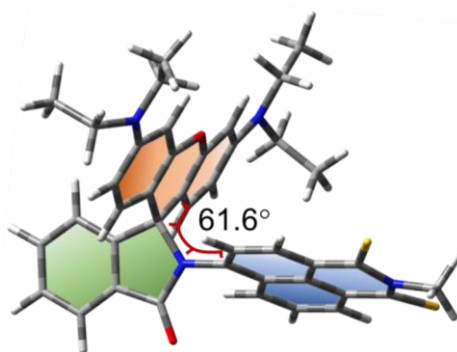

**Fig. S50** Optimized ground state geometry of **Rho-NIS**. The selected dihedral angles are presented. Calculations were performed by DFT at the B3LYP/6-31G(d) level with Gaussian 09.

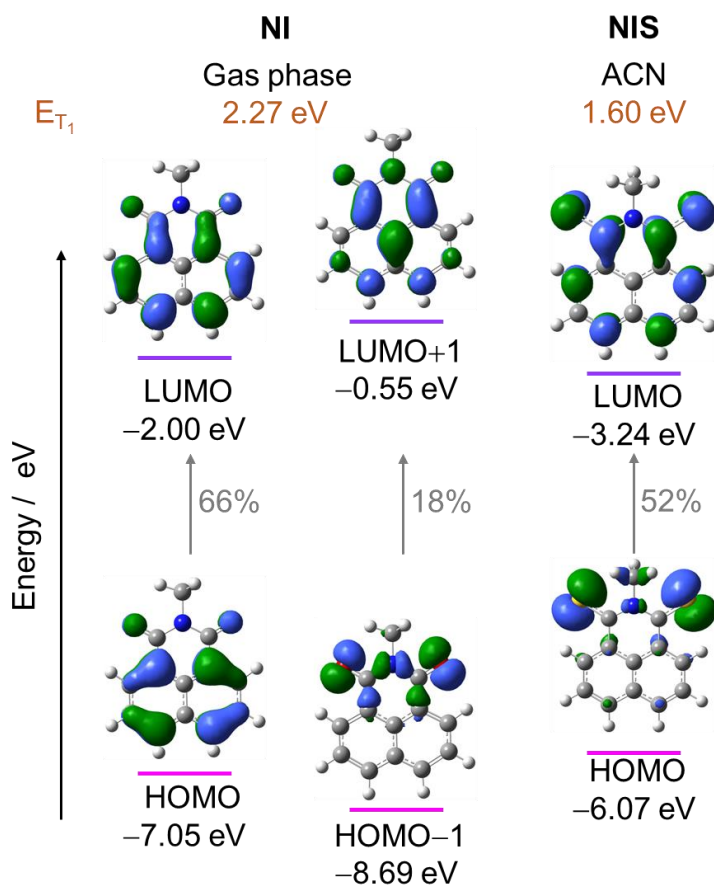

**Fig. S51** Selected frontier molecular orbitals taking part in the  $T_1$  states of **NI** in gas phase and **NIS** in ACN (isovalue = 0.04). The orbital transition probability and energy of  $T_1$  states are also shown. Calculation was performed by DFT at the UB3LYP/6-31G(d) level with Gaussian 09.

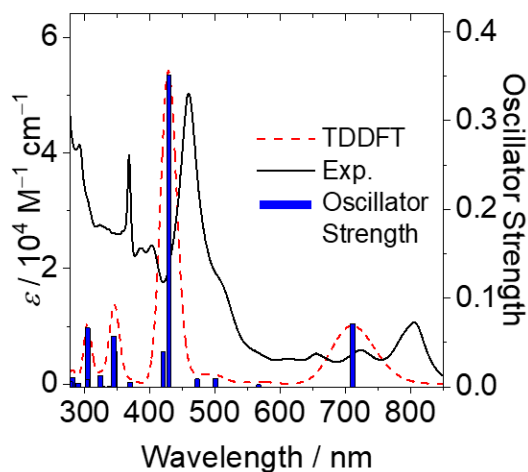

**Fig. S52** Comparison of calculation and experimental data of UV-vis spectra for  $\text{NIS}^{\bullet}$  of **NIS**. The calculations are performed by TDDFT at the UB3LYP/6-31G(d) level with Gaussian 09 in ACN. The experimental data were measured by chemical redox.

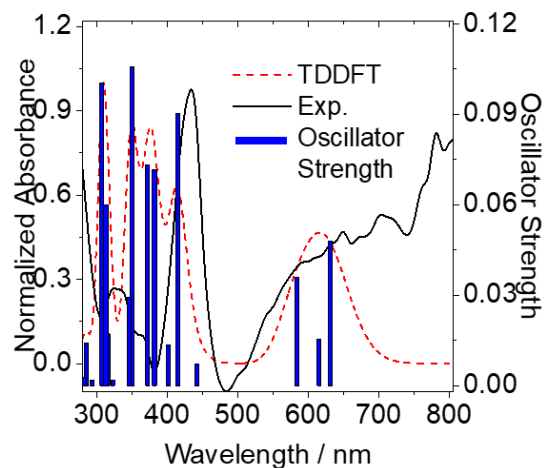

**Fig. S53** Comparison of calculation and experimental data of UV-vis spectra for  $\text{NISH}^{\bullet}$ . The calculations are performed by TDDFT at the UB3LYP/6-31G(d) level with Gaussian 09 in ACN. The experimental data were obtained by nanosecond transient absorption spectra of NIS in deaerated isopropanol.

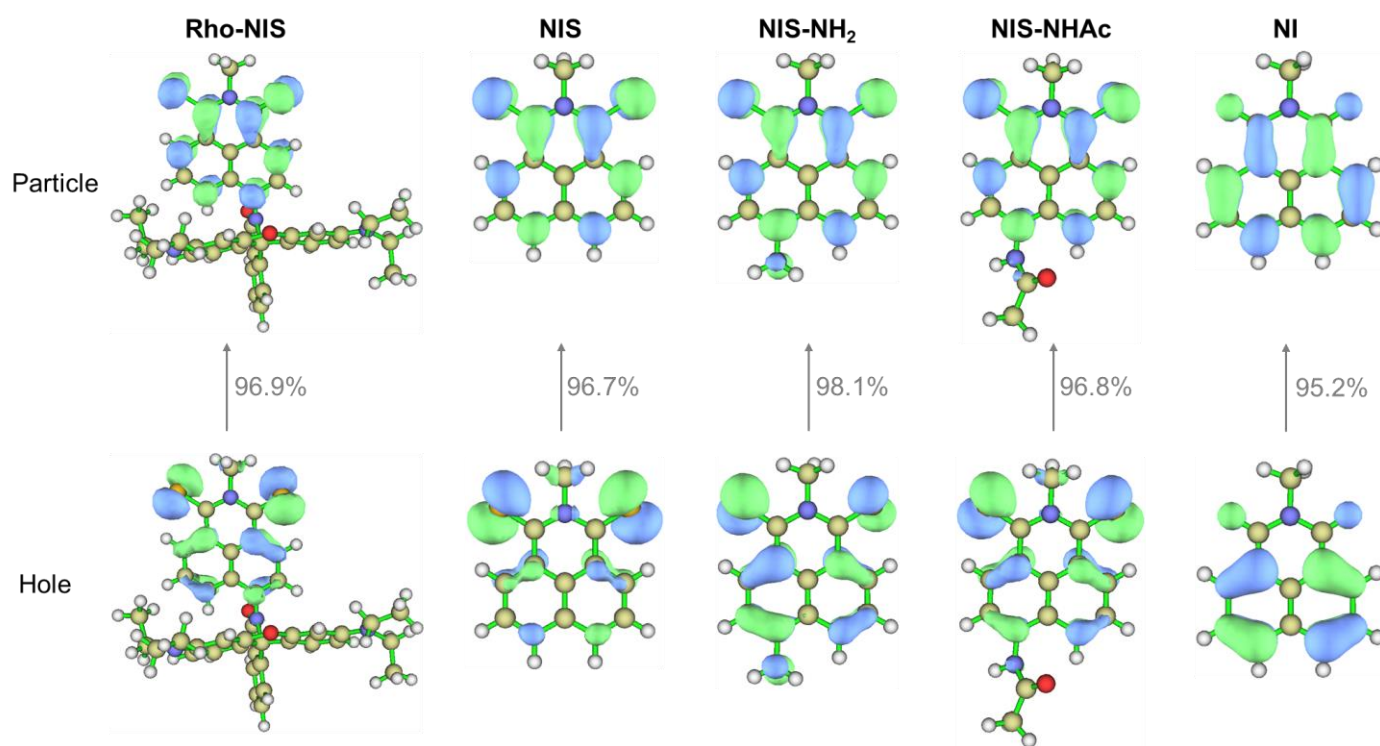

**Fig. S54** The natural transition orbital (NTO) pairs taking part in the  $T_1$  states of the compounds (isovalue = 0.04) and their contribution to this transition in gas phase. Calculation was performed by DFT based on the optimized ground state geometry at the B3LYP/6-31G(d) level with Gaussian 09. NTO analysis was performed by Multiwfn program.

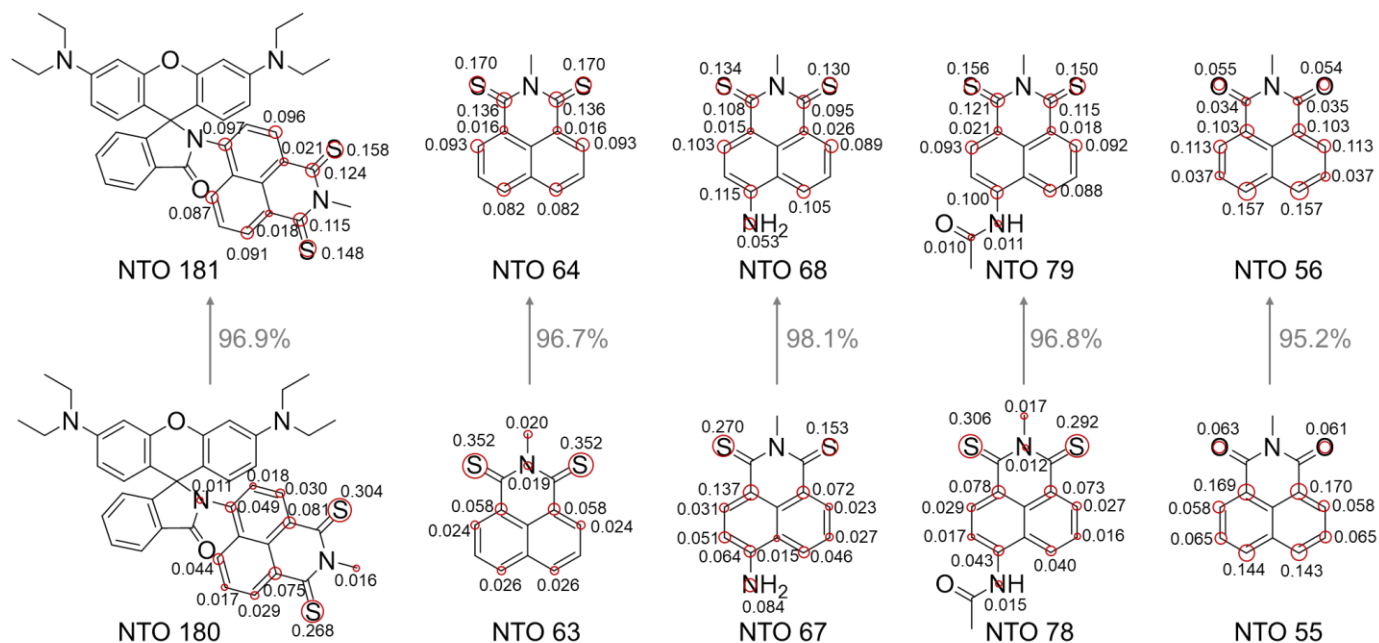

**Fig. S55** The contribution of the each atom to the total NTO pairs taking part in the  $T_1$  states of the compounds (the contribution less than 0.01 are omitted for clarity) in gas phase.



## 11. References

1. Y. Zhao, K. Chen, E. A. Yildiz, S. Li, Y. Hou, X. Zhang, Z. Wang, J. Zhao, A. Barbon, H. G. Yaglioglu and H. Wu, *Chem. –Eur. J.*, 2020, **26**, 3591–3599.
2. V.-N. Nguyen, S. J. Park, S. Qi, J. Ha, S. Heo, Y. Yim, G. Baek, C. S. Lim, D. J. Lee, H. M. Kim and J. Yoon, *Chem. Commun.*, 2020, **56**, 11489–11492.
3. X. Chen, A. A. Sukhanov, Y. Yan, D. Bese, C. Bese, J. Zhao, V. K. Voronkova, A. Barbon and H. G. Yaglioglu, *Angew. Chem., Int. Ed.*, 2022, e202203758.
